## Hippocampus-lateral septum circuitry mediates memory for food location in rats

Elizabeth A. Davis<sup>1\*</sup>, Clarissa M. Liu<sup>1,2\*</sup>, Isabella H. Gianatiempo<sup>1</sup>, Andrea N. Suarez<sup>1</sup>, Alyssa M. Cortella<sup>1</sup>, Joel D. Hahn<sup>3</sup>, and Scott E. Kanoski<sup>1,2</sup>

\*These two authors contributed equally

<sup>1</sup>Human and Evolutionary Biology Section, Department of Biological Sciences, Dornsife College of Letters, Arts and Sciences, University of Southern California, 3616 Trousdale Pkwy, Los Angeles, CA, USA, 90089; <sup>2</sup>Neuroscience Graduate Program, University of Southern California, 3641 Watt Way, Los Angeles, CA, USA. 90089; <sup>3</sup>Neurobiology Section, Department of Biological Sciences, Dornsife College of Letters, Arts and Sciences, University of Southern California, 3616 Trousdale Pkwy, Los Angeles, CA, USA, 90089

Corresponding author:

Scott E. Kanoski, PhD

University of Southern California

3616 Trousdale Parkway, AHF-252

Los Angeles, CA 90089-0372

Phone: [213-821-5762](tel:213-821-5762)

Email: [kanoski@usc.edu](mailto:kanoski@usc.edu)

Classification: Biological Sciences, Neuroscience

Keywords: feeding, cognition, place cells, motivation, reward, foraging, lateral hypothalamic area, prefrontal cortex

1 **ABSTRACT**

2  
3  
4  
5  
6  
7  
8  
9  
10  
11  
12  
13  
14  
15  
16  
17  
18  
19  
20  
21  
22  
23  
24  
25  
26  
27  
28  
29  
30  
31

Remembering the location of a food source is essential for securing energy for survival. Here we identify a hippocampal-septal neural circuit that controls food-directed spatial memory. Both reversible and chronic disconnection of ventral hippocampus CA1 subregion (CA1v) projections to the lateral-septum (LS) using pathway-specific dual viral approaches impaired memory retention in a spatial food-seeking foraging task in rats. However, disconnection of this pathway did not affect performance in an aversive escape-motivated spatial memory task that used the same apparatus and visuospatial cues, suggesting that CA1v-LS signaling selectively mediates spatial memory for food location vs. spatial memory in general. The selectivity of this pathway in mediating foraging-related spatial memory was further supported by results showing that CA1v-LS disconnection did not affect anxiety-like behavior, locomotor activity, or social and olfactory-based appetitive learning. To examine whether CA1v-LS mediation of foraging-related spatial memory involves collateral projections of CA1v neurons, we utilized virus-based neural pathway tracing analyses to identify the mPFC as a collateral target of LS-projecting CA1v neurons. However, functional disconnection of the CA1v and mPFC did not affect spatial memory for food location, thus further supporting the selectivity of CA1v-LS signaling for this behavior. The nucleus accumbens, lateral hypothalamic area, and other brain regions associated with food motivation and reward were identified as second-order targets of CA1v-LS signaling using a multisynaptic anterograde tracing approach. Collective results reveal that CA1v to LS communication plays a critical role in remembering the environmental location of food, thus identifying a novel neural pathway regulating foraging-related memory processes.

## 32 INTRODUCTION

33

34 A survival advantage common to early humans and lower-order mammals is to accurately  
35 remember the location of a food source in the environment, and to then efficiently navigate back  
36 to a shelter or other safe location. The neurobiological substrates that regulate visuospatial  
37 navigation are therefore critical to effectively implement food-directed foraging behavior. Brain  
38 structures within the telencephalon have been identified as being essential for visuospatial  
39 mapping and egocentric orientation in the environment, including the hippocampus and the  
40 medial entorhinal cortex, respectively (1, 2). However, despite that reliably locating food in the  
41 environment is a key selection pressure driving the evolution of visuospatial navigation, the  
42 overwhelming majority of rodent model research on the substrates of spatial learning and  
43 memory have utilized procedures such as the Morris water maze and the Barnes maze that each  
44 involve escaping aversive reinforcement (3, 4). Furthermore, while single unit recordings have  
45 been used to identify specific populations of neurons that subserve distinct navigational functions  
46 (e.g., hippocampal “place cells”, medial entorhinal “grid cells”)(5, 6), the bulk of this research  
47 has recorded neural activity under neutral conditions void of either appetitive or aversive  
48 reinforcement. Very little research has been dedicated to identify brain regions and neural  
49 circuits that may specifically promote food-directed spatial memory, as well as the extent to  
50 which the nature of the reinforcement is a critical factor in deciphering the brain’s control of  
51 visuospatial navigation.

52 The majority of rodent model research investigating brain regions that mediate  
53 visuospatial navigational memory has focused on the anterior and “dorsal” subregion of the  
54 hippocampus (septal pole; HPCd). However, the posterior and “ventral” hippocampus subregion  
55 (temporal pole; HPCv), while classically associated with stress- and affect-associated memory  
56 processes (7), also plays a role in visuospatial learning and memory (8-10). For example, under  
57 some testing conditions selective HPCv lesions impair spatial memory performance in the Morris  
58 water maze (10, 11). Moreover, place cells that are responsive to changes in the visuospatial  
59 environment are present within both the HPCd and HPCv pyramidal layers, with a linear  
60 increase in the scale of representation from the dorsal to the ventral pole (9). Despite a common  
61 role for the HPCd and HPCv in mediating spatial memory, there is also evidence for a functional  
62 distinction between the subregions (7, 12, 13). For instance, lesions of the HPCv but not the

63 HPCd alter stress responses (14) and anxiety-like behavior (15), whereas HPCd but not HPCv  
64 lesions impair spatial memory in an incidental (nonreinforced) procedure (16). These two HPC  
65 subregions also have distinct afferent and efferent neural connections. This disparate  
66 neuroanatomical connectivity supports a framework for a functional diversity in which the HPCd  
67 preferentially processes cortical-derived sensory information and the HPCv preferentially  
68 processes metabolic and limbic-derived affective information (7, 13). The functional distinction  
69 between these two subregions is further supported by the generation of the hippocampus gene  
70 expression atlas, which provides a comprehensive integration of gene expression and  
71 connectivity across the HPC axis (17). Given that both the HPCv and the HPCd participate in  
72 spatial memory but have distinct neuroanatomical connectivity and contributions when it comes  
73 to regulating other cognitive and mnemonic processes, it is feasible that the HPCv and HPCd  
74 support different forms of spatial memory depending on the type of reinforcement or context  
75 associated with the behavior.

76         Recent findings identify the HPCv as a critical brain substrate in regulating feeding  
77 behavior and food-directed memory processes. Reversible inactivation of HPCv neurons after a  
78 meal increases the size of and reduces the latency to consume a subsequent meal (18, 19). In  
79 addition, receptors for feeding-related hormones are more abundantly expressed in the HPCv  
80 compared to the HPCd (e.g., ghrelin receptors (20, 21), glucagon-like peptide-1 [GLP-1]  
81 receptors (22)), and these HPCv endocrine receptor systems alter food intake and feeding-related  
82 memory (23). For example, leptin and GLP-1 act in the HPCv (CA1v subregion) to decrease  
83 food intake and food-motivated conditioned behaviors (24-26), whereas the orexigenic gut-  
84 derived hormone ghrelin administered to the HPCv but not HPCd has opposite effects (23, 27).  
85 Olfactory information, which is intimately connected with feeding behavior, is also preferentially  
86 processed within the HPCv compared with the HPCd. The CA1v, specifically, is bidirectionally  
87 connected to brain regions that process olfactory information (7, 28, 29), and CA1v neurons  
88 respond more robustly to olfactory contextual cues compared with CA1d (8). Further, ghrelin  
89 signaling in the CA1v improves olfactory- and socially-mediated memory for food preference  
90 (30). Given the HPCv appetite-relevant neuroanatomical connections, endocrine and  
91 neuropeptide receptor expression profiles, and functional evidence linking this subregion with  
92 food-motivated behaviors, we hypothesize that HPCv mediation of visuospatial memory is  
93 preferentially biased to food-reinforced foraging behavior.

94 HPCv pyramidal neurons have extensive projection targets throughout the brain (31), yet  
95 the functional relevance of these pathways is poorly understood. Recently, a vHPC dentate  
96 gyrus-CA3v to lateral septum (LS) pathway was identified that suppresses feeding (32).  
97 Similarly, CA1v projections to the medial prefrontal cortex (mPFC) and lateral hypothalamic  
98 area (LHA) mediate feeding-related outcomes associated with GLP-1 and ghrelin signaling,  
99 respectively. CA1v neurons also robustly target the LS (33, 34), however, the relevance of this  
100 pathway to feeding behavior and/or feeding-related memory is unknown. It is feasible that CA1v  
101 to LS projections participate in regulating spatial memory for food location, a notion supported  
102 by findings showing that neuroplastic changes occur in the LS after learning a spatial memory  
103 task (35, 36). Thus, in addition to exploring the role of the HPCv in memory for the spatial  
104 location of food, the present study also investigated the specific role of the CA1v to LS pathway  
105 in foraging-relevant memory processes.

106 To systematically investigate the role of the HPCv and CA1v to LS signaling in  
107 visuospatial learning and memory for food reinforcement, we developed a novel appetitive  
108 reinforcement-based spatial foraging behavioral task that allows for direct comparison with an  
109 aversive reinforcement-based task of similar difficulty that uses the same apparatus and spatial  
110 cues. Performance in these tasks was assessed following pathway-specific dual viral-based  
111 reversible (chemogenetic inhibition) or chronic (targeted apoptosis) disconnection of the CA1v  
112 to LS pathway. To further expand neural network knowledge on CA1v to LS signaling, we used  
113 conditional viral-based neuroanatomical tracing strategies to identify both first-order collateral  
114 and second-order targets of LS-projecting CA1v neurons. Collective results from the present  
115 study identify novel neural circuitry of specific relevance to foraging behavior.

116

## 117 RESULTS

118

### 119 **The ventral hippocampus (HPCv) is required for remembering the spatial location of food**

120 To examine the importance of the HPCv in memory for the spatial location of food,  
121 animals received bilateral *N*-Methyl-D-aspartate excitotoxic lesions of the HPCv (HPCv lesion  
122 n=12) or bilateral sham injections (control n=12) (histological analyses for the neuron-specific  
123 NeuN antigen in Fig. 1A) and were tested rats in a novel appetitive visuospatial memory task  
124 developed in our lab. Results revealed no significant differences in errors (incorrect hole

125 investigations) (Fig. 1E) or latency to locate the food source hole (Fig. 1F) during training.  
126 However, memory probe results show that animals with HPCv lesions decreased the ratio of  
127 correct + adjacent / total holes explored in the first minute compared with controls (Figure 1G;  
128  $p < 0.05$ , entire two minutes in Figure 1H). Post-surgical analyses of food intake (Supp. Fig. 1A)  
129 and body weight (Supp. Fig. 1B) found no group differences in these measures over time. These  
130 collective results indicate the HPCv is required for memory retention but not learning of the  
131 spatial location of food in the environment.

132

### 133 **Ventral hippocampus CA1 (CA1v) projections to the lateral septum (LS) mediate** 134 **appetitive spatial memory for food location, but not aversive spatial memory for escape** 135 **location**

136 A major neuroanatomical target of HPCv CA1 neurons (CA1v) is the LS (34). We  
137 investigated the functional relevance of the CA1v to LS signaling in learning and recalling the  
138 spatial location of food reinforcement using conditional dual viral approaches to either reversibly  
139 (via cre-dependent pathway-specific inhibitory chemogenetics; diagram of approach in Fig. 2A)  
140 or permanently (via cre-dependent pathway-specific caspase-induced lesions; diagram of  
141 approach in Fig. 2B) disconnect CA1v to LS communication. Results from the appetitive spatial  
142 memory task reveal no significant group differences during training in either errors before  
143 locating the correct hole (Fig. 2E) or latency to locate the food source hole (Fig. 2F). However,  
144 memory probe results demonstrate that both acute (pathway-specific DREADDs) and chronic  
145 (pathway-specific caspase) CA1v to LS disconnection decreased the ratio of correct + adjacent /  
146 total holes explored in the entire two minutes of the probe compared with controls (Fig. 2G;  
147  $p < 0.05$ ), with a similar trend in the first minute of the probe (Fig. 2H;  $p = 0.059$ ). Histological  
148 analyses confirmed successful viral transfection of LS-projecting CA1v neurons with DREADDs  
149 (Figs. 2C&D) or caspase (Supp. Figs. 2E&F), and post-surgical analyses of food intake (Supp.  
150 Fig 2A) and body weight (Supp. Fig 2B) found no group differences in these measures over time.  
151 These data demonstrate that CA1v to LS communication is critical for remembering the spatial  
152 location of food, and that these effects are unlikely to be based on differences in energy status or  
153 food motivation.

154 To evaluate whether the CA1v to LS pathway is specifically involved in food-related  
155 spatial memory vs. spatial memory in general, in a separate cohort of animals we tested the effect

156 of reversible and chronic CA1v to LS disconnection in a spatial learning task based on aversive  
157 reinforcement rather than food. Importantly, this task uses the same apparatus and visuospatial  
158 cues as the spatial location food memory task described above, but the animals are motivated to  
159 locate the tunnel to escape mildly aversive stimuli (bright lights, loud noise) with no food  
160 reinforcement in the tunnel (see Fig. 1B). Training results revealed no significant group  
161 differences in errors before correct hole (Fig. 2I) nor latency to locate the escape hole (Fig. 2J).  
162 During the memory probe test, there were no group differences in the ratio of correct + adjacent /  
163 total holes investigated during the first minute (Fig. 2K) nor the entire two minutes (Fig. 2L) of  
164 the memory probe. Histological analyses confirmed successful viral transfection of LS-  
165 projecting CA1v neurons with DREADDs (Figs. 2C&D) or caspase (Supp. Figs. 2E&F), and  
166 post-surgical analyses of food intake (Supp. Fig. 2C) and body weight (Supp. Fig. 2D) found no  
167 group differences in these measures over time. These collective findings suggest that CA1v to  
168 LS signaling specifically mediates spatial memory in a reinforcement-dependent manner.

169

### 170 **CA1v to LS signaling does not participate in HPC-dependent nonspatial appetitive** 171 **memory, anxiety-like behavior, or levels of locomotor activity**

172 To examine the role of CA1v to LS signaling in a nonspatial food-reinforced memory  
173 task, we tested the effect of reversible and chronic CA1v to LS disconnection in the social  
174 transmission of food preference (STFP) test (diagram in Fig. 3A). The HPCv plays an important  
175 role in STFP (30, 37, 38), which tests socially-mediated food-related memory based on previous  
176 exposure to socially-communicated olfactory cues. Results revealed no differences in preference  
177 ratio between groups (Fig. 3B), suggesting that neither acute nor chronic CA1v to LS  
178 disconnection impair food-related memory based on social-based olfactory stimuli.

179 Hippocampal-septal circuitry has been shown to play a role in mediating anxiety and  
180 stress behavior (39-41). Thus, we sought to confirm whether the observed foraging-related  
181 memory impairments following CA1v-LS disconnection may be based, in part, on non-specific  
182 behavioral effects of the disconnection procedures unrelated to memory, including anxiety-like  
183 behavior (zero maze task; diagram of apparatus in Fig. 3C) and general locomotor activity (open  
184 field test). Results showed no significant group differences in time spent in the open zones in the  
185 zero maze test (Fig. 3D) nor in the number of open zone entries (Fig. 3E), suggesting that neither  
186 chronic nor reversible disconnection of the CA1v to LS circuitry influences anxiety-like

187 behavior. In addition, CA1v to LS disconnection had no effect on general locomotor activity in  
188 the open field test (Fig. 3F). Overall these results indicate that that disconnection of CA1v to LS  
189 signaling does not affect nonspatial HPC-dependent appetitive memory in STFP, general  
190 locomotor activity, anxiety-like behavior, or locomotor activity.

191

## 192 **The medial prefrontal cortex is a collateral target of LS-projecting CA1v neurons**

193 In addition to the LS, CA1v neurons also robustly project to the medial prefrontal cortex  
194 (mPFC) and the lateral hypothalamic area, two pathways that we have previously shown to be  
195 involved in feeding behavior (25, 27, 42). To examine whether LS-projecting CA1v neurons  
196 have collateral targets in the mPFC, LHA, or in other brain regions, we utilized a conditional  
197 dual viral neural pathway tracing approach that identifies collateral targets of a specific  
198 monosynaptic pathway (CA1v->LS; diagram of approach in Fig. 4A, representative CA1v  
199 injection site in Fig. 4B, representative CA1v injection site in Fig. 4C). Results revealed that LS-  
200 projecting CA1v neurons also project to the mPFC (Fig. 4D), whereas minimal collateral  
201 labeling was observed in the LHA or in other brain regions (data not shown). Thus, it may be the  
202 case that the impaired spatial memory for food location observed following either reversible or  
203 chronic CA1v to LS disconnection are based, in part, on CA1v to mPFC signaling from the same  
204 CA1v to LS projecting neurons.

205

## 206 **Neither CA1v to mPFC nor CA1v to LHA signaling contribute to spatial memory for food** 207 **location**

208 To test the functional relevance of the CA1v neural pathways that either do (CA1v to  
209 mPFC) or do not (CA1v to LHA) collateralize from CA1 to LS projections in food-directed  
210 spatial learning and memory, we took advantage of the exclusively ipsilateral projections from  
211 CA1v to mPFC (25) (and to LHA (42)) and used a ‘contralesional’ approach to functionally  
212 disconnect the CA1v to mPFC (or LHA) pathway (diagram of approach in Fig. 4E), while  
213 leaving CA1v and mPFC (or LHA) communication to other brain regions intact. Post-surgical  
214 analyses of food intake (Supp. Fig. 3A,C) and body weight (Supp. Fig. 3B,D) found no group  
215 differences in these measures over time. Training results from the appetitive spatial memory task  
216 revealed no group differences in errors before locating the correct hole (Fig. 4F, 4L) or latency to  
217 locate the food-baited hole (Fig. 4G, 4L) for either the CA1v-mPFC or the CA1v-LHA



218 disconnection groups. Memory probe results demonstrate that neither CA1v to mPFC nor CA1v  
219 to LHA disconnection altered the ratio of correct + adjacent / total holes explored in the first  
220 minute (Fig. 4H, 4M) or the entire two minutes (Fig. 4I, 4N) compared with controls. These data  
221 collectively demonstrate that CA1v to LS mediation of foraging-related memory does not require  
222 collateral projections to the mPFC neural pathway. Further, CA1v to LHA neural signaling,  
223 although important for other food-related conditioned appetitive behaviors (27, 42), is not  
224 required for either learning or remembering of the spatial location of food.

225

### 226 **Second-order targets of CA1v to LS neurons include the mPFC, the LHA, and the ACB**

227 We used a dual viral tracing strategy (diagram of approach in Fig. 5A; representative LS  
228 injection site in Fig. 5B) to identify downstream targets of LS-projecting CA1v neurons. Results  
229 revealed that the mPFC (Fig. 5C), the LHA (Fig. 5D) and the nucleus accumbens (ACB; Fig. 5E)  
230 are among the strongest second-order targets of the CA1v to LS-projecting neurons. Quantitative  
231 analyses using a custom built data-entry platform (Axiome C, created by JDH) are summarized  
232 graphically for a representative animal on a brain flatmap summary diagram (Fig. 5F) for the  
233 hemisphere ipsilateral (top) and contralateral (bottom) to the injection sites. The data are also  
234 summarized in tabular form in Supplementary Table 1.

235

### 236 **DISCUSSION**

237 Memory for the physical location of a food source is adaptive for maintaining adequate  
238 energy supply for reproduction and survival. However, the neural circuits mediating this  
239 complex behavior are not well understood as research on visuospatial memory has  
240 predominantly used tasks with either aversive or neutral/passive reinforcement. The present  
241 study identified a specific monosynaptic CA1v to LS pathway as a necessary substrate for food-  
242 motivated spatial memory using a newly developed foraging task. Moreover, the selectivity of  
243 the CA1v-LS pathway in mediating spatial memory for food location is supported by results  
244 showing that disconnection of this pathway did not affect performance in an escape-motivated  
245 spatial memory task of comparable difficulty conducted in the same apparatus, anxiety-like  
246 behavior, or olfactory and social-based appetitive memory. Viral pathway tracing identified that  
247 LS-projecting CA1v neurons also send collateral projections to the mPFC, however, functional  
248 disconnection of CA1v-mPFC signaling did not impair spatial memory for food location.

249 Utilization of an anterograde multisynaptic viral tracing approach and quantitative forebrain-  
250 wide axon mapping analyses revealed that the CA1v-LS pathway sends second-order projections  
251 to various feeding and reward-relevant neural substrates such as the LHA, ACB, and mPFC.  
252 Collectively, these data establish monosynaptic CA1v to LS signaling as essential for spatial  
253 memory-based foraging behavior, and we further identify a neural network of interconnected  
254 feeding-relevant substrates that are collateral and/or downstream targets of this pathway.

255 Historically, the hippocampus has been divided into the dorsal and ventral subregions  
256 that have both distinct and overlapping functions, anatomical connections, and genetic and  
257 receptor expression profiles (12, 13, 17, 31, 43). The HPCd has been predominantly implicated  
258 in facilitating spatial memory, whereas the HPCv is linked with stress responses, affective  
259 behavior, and energy balance. However, the HPCv also plays a role in spatial memory,  
260 particularly for goal-directed navigation. Consistent with present results, a recent study found  
261 that both the HPCd and HPCv were critical for food reward-directed spatial navigation in an  
262 obstacle-rich complex environment (44). Under some testing conditions, spatial learning and  
263 memory in an aversive reinforcement-based water maze also requires both subregions of the  
264 HPC (45). Similarly, whole-brain analysis of blood flow in rats during retrieval of spatial  
265 memory in an aversive reinforcement-based Barnes maze task revealed increased activation in  
266 the CA1d and CA1-3v in trained animals compared to controls (46). These results indicate that  
267 spatial processing in the hippocampus is organized longitudinally, and that both HPCd and HPCv  
268 are important for goal-directed spatial navigation. Here we extend these findings by revealing  
269 that the HPCv, and more specifically, CA1v to LS signaling, is preferentially biased to  
270 processing food-reinforcement based spatial memory.

271 Septohippocampal circuitry, which includes extensive connections between the  
272 hippocampus (HPCd and HPCv) and septal nuclei (LS and medial), has been studied in the  
273 context of a variety of behaviors, including, memory, stress and anxiety. HPCv-LS connections,  
274 in particular, are linked with anxiety-like behavior. Transient pharmacological inactivation of  
275 ipsilateral projections from the HPCv to LS suppresses anxiety-like behavior in an elevated plus  
276 maze task (40), while bilateral DREADDs-mediated manipulation of bilateral HPCv to LS  
277 projections during the same task reveal distinct anxiogenic and anxiolytic populations of neurons  
278 (39). These findings suggest that hippocampal effects on anxiety may be mediated by  
279 functionally distinct populations in the HPCv that project to the LS, and further, are potentially

280 dependent on laterality. However, these studies differ from the present study in that both CA1v  
281 and CA3v subregions of the HPCv were targeted. Though we did not find changes in anxiety-  
282 like behavior after reversible of chronic disconnection of CA1v to LS, the inclusion of CA3v in  
283 the work described above prevents direct comparisons to our own results. Overall, these studies  
284 combined with present results are consistent with a framework that overlapping and divergent  
285 functions of the HPCv to LS signaling in both feeding and emotional regulation are important for  
286 modulating complex motivated behavior in accordance with cognitive input (47).

287 Present results identify the CA1v-LS pathway in coordinating food-motivated behavior  
288 with learned spatial information. While the use of aversive reinforcement-based spatial memory  
289 tasks are predominant, the radial arm maze has been used to investigate food-motivated spatial  
290 reference memory (analogous to the spatial memory probe in the present study) and spatial  
291 working memory using multiple consistently food-baited arms (48). Inconsistent with the present  
292 results, a previous study utilizing a four-baited/four-unbaited version of the eight-arm radial  
293 maze task found that NMDA-mediated lesions of the HPCd, but not HPCv, impair spatial  
294 reference and working memory (49). Another study using the same working memory task  
295 reported that complete HPC lesions impaired both spatial and working memory, whereas lesions  
296 to either the HPCd, HPCv, or intermediate HPC had no effect on memory performance (50).  
297 Future studies will need to address whether discrepancies between the present results and these  
298 studies are based on the differences between the behavioral tasks and/or differences in loss of  
299 function methodologies. With regards to the latter, we note that our chemogenetic and lesion  
300 approaches offered far greater specificity (LS-projecting CA1v neurons vs. whole HPCv)  
301 compared with these studies.

302 Our multisynaptic neuroanatomical results offer a framework for future work to examine  
303 the broader anatomical circuitry involved in foraging-related behaviors. Utilizing dual viral  
304 approaches and systematic forebrain-wide quantitative mapping analyses, our findings confirm  
305 that the CA1v-LS pathway projects downstream to other neural substrates involved in feeding  
306 and motivated behavior, including the LHA, ACB, and mPFC. Given that the LS-LHA pathway  
307 has been shown to affect food intake (51), and that metabolic activity in the LS and ACB is  
308 associated food anticipatory activity in rabbit pups (52), it is possible that the LHA and/or the  
309 ACB are functional downstream targets of CA1v-LS signaling for coordinating foraging  
310 behavior. It is unlikely, however, that the mPFC is a functional target of CA1v-LS signaling for

311 appetitive spatial memory control. For example, our contralesional CA1v-mPFC disconnection  
312 approach, which did not affect appetitive spatial memory, not only disconnects all ipsilateral  
313 direct HPCv to mPFC communication, but also all ipsilateral multisynaptic HPCv to mPFC  
314 connections (including via LS). Consistent with this hypothesis, anterograde labeling  
315 downstream of CA1v to LS projections was not observed in the contralateral mPFC. It is  
316 possible, however, that CA1v → LS → mPFC signaling is relevant to other motivated behaviors.  
317 While we examined food-motivated and escape-motivated spatial memory, functional analyses  
318 of this circuit may be extended to drug-motivated, social-motivated, or water-motivated spatial  
319 memory tasks.

320 Collectively, we identify a CA1v to LS pathway involved in foraging-related, but not  
321 escape-motivated, spatial memory. Furthermore, the selectivity of this pathway to appetitive  
322 spatial memory is supported by data showing that neither chronic nor reversible disruption of  
323 CA1v to LS signaling influenced various other behavioral outcomes. We also systematically  
324 characterized collateral and second-order projections of this pathway, which demonstrate  
325 overlapping pathways coordinated in the higher-order control of energy balance. These data shed  
326 light on the neural systems underlying complex motivated behaviors that require functional  
327 connections of cognitive and feeding-relevant substrates.

328

## 329 **METHODS**

330

### 331 **Animals**

332 Adult male Sprague–Dawley rats (Envigo; 250-275g on arrival) were individually housed  
333 in hanging wire cages with *ad libitum* access (except where noted) to water and chow (LabDiet  
334 5001, LabDiet, St. Louis, MO) on a 12h:12h reverse light/dark cycle. All procedures were  
335 approved by the University of Southern California Institute of Animal Care and Use Committee.

336

### 337 **General intracranial injection procedures**

338 Rats were anesthetized via an intramuscular injection of an anesthesia cocktail (ketamine  
339 90mg/kg body weight [BW], xylazine, 2.8mg/kg BW and acepromazine and 0.72mg/kg BW)  
340 followed by a pre-operative, subcutaneous injection of analgesic (ketoprofen, 5mg/kg BW). Post-  
341 operative analgesic (subcutaneous injection of ketoprofen, 5mg/kg BW) was administered once

342 per day for 3 days following surgery. The surgical site was shaved and prepped with iodine and  
343 ethanol swabs, and animals were placed in a stereotaxic apparatus for stereotaxic injections.  
344 NMDA or viruses were delivered using a microinfusion pump (Harvard Apparatus, Cambridge,  
345 MA, USA) connected to a 33-gauge microsyringe injector attached to a PE20 catheter and  
346 Hamilton syringe. Flow rate was calibrated and set to 83.3nl/sec. Injectors were left in place for  
347 2min post-injection to allow for complete delivery of the infusate. Specific viruses/drugs,  
348 coordinates, and injection volumes for procedures are detailed below. Following the completion  
349 of all injections, incision sites were closed using either surgical staples, or in the case of  
350 subsequent placement of an indwelling cannula, simple interrupted sutures. Upon recovery from  
351 anesthesia and return to dorsal recumbency, animals were returned to the home cage. All  
352 behavioral procedures occurred 21 days after injections to allow for complete transduction and  
353 expression of the viruses, or complete lesioning drugs. General intracranial injection procedures  
354 were followed for all injection procedures below.

355

### 356 **Chronic lesions of the HPCv**

357 Lesion animals received bilateral excitotoxic HPCv lesions via intracranial injections of  
358 N-methyl-d-aspartate (NMDA; 200nL per hemisphere) at the following coordinates at three  
359 different sites along the rostrocaudal extent of the HPCv (53): [1] -4.8mm AP, +/-5.0mm ML, -  
360 7.5mm DV, [2] -5.5mm AP, +/-4.5mm ML, -7.0mm DV, and [3] -6.1mm AP, +/-4.8mm ML, -  
361 7.0mm DV with control animals receiving vehicle saline in the same location. The reference  
362 points for AP and ML coordinates were defined at bregma, and the reference point for the DV  
363 coordinate was defined at the skull surface at the target site.

364 Bilateral HPCv lesion brains were histologically evaluated for the correct placement of  
365 lesions in 1 out of 5 series of brain tissue sections. Neurons were visualized using  
366 immunohistochemistry for the neuron specific antigen NeuN (see Immunohistochemistry), with  
367 a complete lesion indicated by a lack of neuronal staining in the HPCv target region. Here, n=0  
368 animals were removed. Representative images in Fig. 1A.

369

### 370 **Acute and chronic disconnection of the CA1v to LS neural pathway**

371 Cre-dependent dual viral strategies were used to generate the following groups: [1] acute  
372 chemogenetic disconnection of the CA1v to LS neural pathway (DREADDs; diagram of

373 approach in Fig. 2A), [2] chronic disconnection of the CA1v to LS neural pathway (caspase  
374 lesion-induced; diagram of approach in Fig. 2B), and [3] a common/shared control group for  
375 these two disconnection strategies.

376         Regardless of group, all animals received a bilateral AAV retro-cre injection in the LS  
377 (AAV2[retro]-hSYN1-EGFP-2A- iCre-WPRE; 200nL per side) at the following stereotaxic  
378 coordinates (53): +0.84mm AP, +/-0.5mm ML, -4.8mm DV. The reference points for all LS  
379 coordinates were defined at bregma.

380         According to experimental group, animals received a different virus delivered to the  
381 CA1v subregion of the HPCv. All viruses were administered to the CA1v at the following  
382 stereotaxic coordinates (53): -4.9mm AP, +/-4.8mm ML, -7.8mm DV. The reference points for  
383 AP and ML coordinates were defined at bregma, and the reference point for the DV coordinate  
384 was defined at the skull surface at the target site.

385         [1] *DREADDs group for reversible inactivation of CA1v to LS*: To allow reversible  
386 chemogenetic inactivation of the CA1v to LS neural pathway, one group of animals received a  
387 bilateral CA1v injection of a cre-dependent virus to drive expression of inhibitory designer  
388 receptors activated by designer drugs (DREADDs), (AAV-Flex-hm4Di-tdTomato). This dual  
389 viral strategy drives expression of inhibitory DREADDs exclusively in LS-projecting CA1v  
390 neurons, which enables acute inactivation of these neurons by injection of the DREADDs ligand,  
391 clozapine-N-oxide (CNO), at the time of behavioral testing.

392         [2] *Caspase group for chronic inactivation of CA1v to LS*: To allow chronic  
393 disconnection of the CA1v to LS neural pathway, a second group of animals received a bilateral  
394 CA1v cre-dependent caspase virus (AAV1-Flex-taCasp3-TEVp; 200nL per side) mixed with a  
395 cre-dependent reporter virus (AAV-flex-tdTomato; 200nL per side) for histological verification.  
396 This dual viral strategy drives expression of the apoptosis-mediator molecule caspase exclusively  
397 in LS-projecting CA1v neurons, which induces apoptotic cell death in these neurons while  
398 leaving other CA1v neurons intact.

399         [3] *Common control*: A common control group was generated for both of these  
400 experimental groups, with this group receiving a cre-dependent control AAV in the CA1v  
401 (AAV-flex-tdTomato).

402         Immediately following viral injections, all animals were surgically implanted with a  
403 unilateral indwelling intracerebroventricular (ICV) cannula (26-gauge, Plastics One, Roanoke,

404 VA) targeting the lateral ventricle (VL). Cannulae were implanted and affixed to the skull with  
405 jeweler's screws and dental cement at the following stereotaxic coordinates:  $-0.9\text{mm AP}$ ,  
406  $+1.8\text{mm ML}$ ,  $-2.6\text{mm DV}$ . The reference points for AP and ML coordinates were defined at  
407 bregma, and the reference point for the DV coordinate was defined at the skull surface at the  
408 target site. Placement for the VL cannula was verified by elevation of blood glucose resulting  
409 from an injection of  $210\mu\text{g}$  ( $2\mu\text{L}$ ) of 5-thio-D-glucose (5TG) using an injector that extended  
410  $2\text{mm}$  beyond the end of the guide cannula (54). A post-injection elevation of at least 100% of  
411 baseline glycemia was required for subject inclusion. Animals that did not pass the 5TG test  
412 were retested with an injector that extended  $2.5\text{mm}$  beyond the end of the guide cannula and,  
413 upon passing the 5TG test, were subsequently injected using a  $2.5\text{mm}$  injector instead of a  $2\text{mm}$   
414 injector for the remainder of the study. Prior to behavioral testing where noted, all animals  
415 received an ICV  $18\text{mmol}$  infusion ( $2\mu\text{L}$  total volume) of the DREADDs ligand clozapine N-  
416 oxide (CNO) (55), rendering only DREADDs animals chemogenetically inactivated. CNO  
417 injections were hand delivered using a 33-gauge microsyringe injector attached to a PE20  
418 catheter and Hamilton syringe through the indwelling guide cannulae. Injectors were left in place  
419 for 30sec to allow for complete delivery of the CNO.

420 Cre-dependent DREADD expression targeting LS-projecting neurons in CA1v was  
421 evaluated based on localization of the fluorescent reporter tdTomato. Immunohistochemistry for  
422 red fluorescent protein (RFP) was conducted to amplify the tdTomato signal (see  
423 Immunohistochemistry). After histological analysis, animals were removed based on misses ( $n=3$   
424 for cohort 1;  $n=0$  for cohort 2). Representative images in Figs. 2C&D.

425 Neuronal apoptosis due to activation of cre-dependent caspase targeting LS-projecting  
426 neurons in CA1v was evaluated based on reduction of the fluorescent reporter tdTomato due to  
427 neuron cell death compared with histological controls. Caspase brains (which received a retro-  
428 cre virus in the LS in conjunction with an injection of cre-dependent caspase virus mixed with a  
429 cre-dependent virus that drives a tdTomato fluorescent reporter in the CA1v) were compared to  
430 histological control brains (that received a retro-cre virus in the LS in conjunction with only a  
431 cre-dependent that drives a tdTomato fluorescent reporter in the CA1v, which was equivalently  
432 diluted to match the caspase injections). In both groups, immunohistochemistry for red  
433 fluorescent protein (RFP) was conducted to amplify the tdTomato signal (see  
434 Immunohistochemistry). Confirmation of successful caspase activation in the CA1v was

435 evaluated by reduced tdTomato fluorescence in comparison to histological control animals.  
436 Animals were removed based on incomplete caspase lesioning (n=0 for cohort 1; n=0 for cohort  
437 2). Representative images in Supplementary Figs 2E&F.

438

439

#### 440 **Identification of collateral targets of CA1v to LS projecting neurons**

441 Collateral targets of the CA1v to LS neural pathway were identified using a dual viral  
442 approach (diagram of approach in Fig. 4A) where a retrograde vector was injected into the LS  
443 (AAV2retro-hSyn1-eGFP-2A-iCre-WPRE; 200nL per side; coordinates as above), and a Cre-  
444 dependent anterograde vector (AAV1-CAG-Flex-tdTomato-WPRE-bGH; 200nL per side;  
445 coordinates as above) was injected in the CA1v. This latter injection drives tdTomato transgene  
446 expression in CA1v neurons that project to the LS, which allows for brain-wide analyses of  
447 collateral targets. After 3 weeks of incubation time to allow for complete transduction and  
448 expression of the viruses, brains were collected, immunohistochemically processed, and imaged  
449 as described below.

450

#### 451 **Contralesional disconnection of the CA1v to mPFC neural pathway or the CA1v to LHA** 452 **neural pathway**

453 To functionally disconnect the CA1v to mPFC pathway (diagram of approach in Fig. 4E),  
454 or the CA1v to LHA pathway (diagram of approach in Fig. 4J) lesion animals received a  
455 unilateral excitotoxic CA1v lesion via an intracranial injection of NMDA (200nL) at the  
456 following coordinates (34): -4.9mm AP, + or - 4.8mm ML (left/right counterbalanced to be  
457 contralateral to mPFC or LH lesion within-animal), -7.8mm DV, with control animals receiving  
458 vehicle saline injections in the same location. The reference points for AP and ML coordinates  
459 were defined at bregma, and the reference point for the DV coordinate was defined at the skull  
460 surface at the target site.

461 In addition to the CA1v lesion, CA1v to mPFC disconnect animals also received a  
462 unilateral excitotoxic mPFC lesion via two intracranial injections of NMDA (100nL per  
463 injection) at the following coordinates (53): [1] +2.7mm AP, + or - 0.7mm ML (left/right  
464 counterbalanced to be contralateral to CA1v lesion within-animal), -5.3mm DV and [2] +3.0mm  
465 AP, + or - 0.7mm ML (left/right counterbalanced to be contralateral to CA1v lesion within-



466 animal),  $-4.7\text{mm DV}$ , with control animals receiving vehicle saline in the same location. The  
467 reference points for all mPFC coordinates were defined at bregma.

468 In addition to the CA1v lesion, CA1v to LHA disconnect animals also received a  
469 unilateral excitotoxic LHA lesion via an intracranial injection of NMDA (100nL per injection) at  
470 the following coordinates (53):  $+2.9\text{mm AP}$ ,  $+ \text{ or } - 1.1\text{mm ML}$  (counterbalanced to be  
471 contralateral to CA1v lesion within-animal),  $-8.9\text{mm DV}$ , with control animals receiving vehicle  
472 saline in the same location. The reference points for all LHA coordinates were defined at  
473 bregma.

474 Contralateral brains were histologically evaluated for the correct placement of lesions by  
475 visualizing neurons using immunohistochemistry for the neuron specific antigen NeuN (see  
476 Immunohistochemistry). A complete lesion was indicated by a lack of neuronal labeling in the  
477 CA1v, mPFC, or LHA target regions as necessary. Here,  $n=0$  animals were removed.

478

479

#### 480 **Identification of second order targets of CA1v to LS projecting neurons**

481 To identify second order targets of CA1v to LS-projecting neurons (diagram of approach  
482 in Fig. 5A), animals received a bilateral injection of a transsynaptic Cre-inducing anterograde  
483 vector into CA1v (AAV1-hSyn-Cre-WPRE-hGH; 200nL per side; coordinates as above) that  
484 drives expression of Cre in both first-order (CA1v injection site) and 2<sup>nd</sup>-order (but not 3<sup>rd</sup>-  
485 order) neurons via transsynaptic virion release (56, 57). This was combined with a bilateral  
486 injection of a Cre-dependent anterograde vector in the LS (AAV1-CAG-Flex-tdTomato-WPRE-  
487 bGH; 200nL per side, coordinates as above). This latter injection allows for anterograde tracing  
488 from 1<sup>st</sup>-order LS targets receiving synaptic input from CA1v. After 3 weeks of incubation time  
489 to allow for complete transduction and expression of the viruses, brains were collected,  
490 immunohistochemically processed, and imaged as described below.

491 Data were entered using a custom built data-entry platform (Axiome C, created by JDH)  
492 built around Microsoft Excel software and designed to facilitate entry of data points for all gray  
493 matter regions across their atlas levels as described in a rat brain reference atlas (Brain Maps 4.0,  
494 Swanson, 2018). The Axiome C approach was used previously to facilitate the analysis of brain  
495 gene-expression data (Hahn et al., 2019). An ordinal scale, ranging from 0 (absent) to 7 (very  
496 strong), was used to record the qualitative weight of anterograde labeling. An average value was

497 then obtained for each region across its atlas levels for which data were available. These data are  
498 summarized graphically for a representative animal on a brain flatmap summary diagram  
499 (adapted from (58)).

500

### 501 **Food intake and body weight**

502 For the day prior to surgery (day 0) and for two weeks thereafter, 24h chow intake was  
503 measured daily just prior to dark cycle onset to determine effects of experimental procedures on  
504 food intake. Spillage was accounted for daily by collecting crumbs onto Techboard paper placed  
505 under the cages of each animal. Additionally, animals were weighed daily just prior to dark cycle  
506 onset to determine effects of experimental procedures on body weight.

507

### 508 **Appetitive spatial memory foraging task**

509 To test visuospatial learning and memory for food reinforcement, we developed a novel  
510 spatial foraging task modified from the traditional Barnes maze procedure. Throughout this  
511 paradigm, animals were maintained at 85% free-feeding body weight. The paradigm involves an  
512 elevated gray circular platform (diameter: 122cm, height: 140 cm) consisting of 18 uniform holes  
513 (9.5cm diameter) spaced every twenty degrees around the outside edge. Under one of the holes is  
514 a hidden tunnel (38.73cm L x 11.43cm W x 7.62cm D and a 5.08cm step). Surrounding the table  
515 are distinct spatial cues on the wall (e.g. holiday lights, colorful shapes, stuffed unicorn) that are  
516 readily visible to the animal. In contrast to the traditional Barnes Maze where an animal uses the  
517 spatial cues to escape mildly aversive stimuli in the environment (e.g. bright light and loud  
518 sound), this task utilizes food as motivation, such that each hidden tunnel contained five 45mg  
519 sucrose pellets (Bio-Serv, Flemington, NJ). Additionally, a quiet white noise (60dB) was used to  
520 drown out background noise and floor lamps were used for low-level ambient lighting. On the  
521 first day, each animal underwent a habituation session consisting of 1min inside a transport bin  
522 under the table, 2min underneath the start box in the center of the table, and 3min inside the  
523 hidden tunnel with 5 sucrose pellets. During training, each rat was assigned a specific escape  
524 hole according to the position of the spatial cues with the location counterbalanced across  
525 groups. Animals were trained over the course of two trials per day for four days (five days in  
526 contralesional experiments) to learn to use the spatial cues in order to locate the correct hole with  
527 the hidden tunnel with sucrose pellets. Learning during training was scored via animal head

528 location tracking by AnyMaze Behavior Tracking Software (Stoelting Co., Wood Dale, IL). The  
529 incorrect hole investigations prior to finding the correct hole with sucrose pellets (“errors before  
530 correct hole”) as well as time to finding the correct hole (“latency to correct hole”) were  
531 calculated as an average of the two trials per day, and examined across days of training. After the  
532 conclusion of training, rats had a two-day break where no procedures occurred, then were tested  
533 in a single 2min memory probe in which the hidden tunnel and sucrose pellets were been  
534 removed. All animals received an ICV 18mmol infusion of CNO (2uL total volume) 1h prior to  
535 the memory probe, rendering only DREADDs animals chemogenetically inactivated by CNO. In  
536 the memory probe, the ratio of the correct hole plus adjacent hole investigations over the total  
537 number of hole investigations were calculated via animal head location tracking by AnyMaze  
538 Behavior Tracking Software (Stoelting, Wood Dale, IL). The correct holes plus adjacent over  
539 total were compared between groups for the first minute and entire two minutes of the probe for  
540 all tests. A diagram of the apparatus used for the spatial foraging task is included in Fig. 1B.

541

#### 542 **Aversive spatial memory escape task (Barnes maze)**

543 To test visuospatial learning and memory for escape reinforcement, we used a modified  
544 traditional Barnes maze procedure, which is a visuospatial-based escape task. Procedures were  
545 exactly the same as above (Appetitive spatial memory foraging task, using the same apparatus, in  
546 the same room, and with the same visuospatial cues) aside from the omission of the sucrose  
547 pellets in the hidden tunnel, the presence of mildly aversive bright (120W) overhead lighting  
548 instead of dim ambient lighting, and a mildly aversive loud white noise (75dB) instead of a quiet  
549 white noise (60dB). This allowed us to test spatial learning and memory motivated by escape  
550 from aversive stimuli in a nearly-identical procedure to our spatial foraging test for learning and  
551 memory motivated by palatable food consumption. A diagram of the apparatus used for the  
552 spatial escape task is included in Fig. 1B.

553

#### 554 **Social transmission of food preference (STFP)**

555 To examine food-related memory based on social- and olfactory-based cues, we utilized  
556 the social transmission of food preference (STFP) task and adapted protocols from (30, 38, 59,  
557 60). Briefly, untreated normal adult rats are designated as ‘Demonstrators’, while experimental  
558 groups are designated as ‘Observers’. Demonstrators and Observers are habituated to a powdered

559 rodent chow [LabDiet 5001 (ground pellets), LabDiet, St. Louis, MO] overnight. 24h later,  
560 Observers are individually paired with demonstrators and habituated to social interaction, where  
561 rat pairs are placed in a social interaction arena (23.5cm W × 44.45cm L × 27cm H clear plastic  
562 bin with Sani-chip bedding) and allowed to interact for 30min. Both Observers and  
563 Demonstrators are returned to their home cages and food is withheld for 23hr prior to the social  
564 interaction. For the social interaction, Demonstrators are given the opportunity to consume one  
565 of two flavors of powdered chow (flavored with 2% marjoram or 0.5% thyme; counterbalanced  
566 according to group assignments) for 30min in a room separate from Observers. Our pilot studies  
567 and previous published work (60, 61) show that rats equally prefer these flavors of chow. The  
568 Demonstrator rat is then placed in the social interaction arena with the Observer rat, and the pairs  
569 are allowed to socially interact for 30min. Observers are then returned to their home cage and  
570 allowed to eat *ad libitum* for 1h and then food is removed. The following day, the 23h food-  
571 deprived Observer animals are given a home cage food preference test for either the flavor of  
572 chow paired with the Demonstrator animal, or a novel, unpaired flavor of chow that is a flavor  
573 that was not given to the Demonstrator animal (2% marjoram vs. 0.5% thyme; counterbalanced  
574 according to group assignments). All animals received an ICV 18mmol infusion of CNO (2uL  
575 total volume) 1h prior to the social interaction session, rendering only DREADDs animals  
576 chemogenetically inactivated by CNO. Food intake (1h) was recorded with spillage accounted  
577 for by collecting crumbs onto Techboard paper that is placed under the cages of each animal.  
578 The % preference for the paired flavor is calculated as:  $100 \times \frac{\text{Demonstrator-paired flavored chow intake}}{\text{Demonstrator-paired flavored chow intake} + \text{Novel flavored chow intake}}$ . In this procedure, normal untreated animals  
579 learn to prefer the Demonstrator paired flavor based on social interaction and smelling the breath  
580 of the Demonstrator rat (30, 38, 59-61). A diagram of the STFP procedure is included in Fig. 3E.

582

### 583 **Zero maze**

584 The zero maze behavioral paradigm was used to evaluate anxiety-like behavior. The zero  
585 maze apparatus used was an elevated circular track, divided into four equal length sections. Two  
586 zones were open with 3 cm high curbs ('open zones'), whereas the two other zones were closed  
587 with 17.5 cm high walls ('closed zones'). All animals received an ICV 18mmol infusion of CNO  
588 (2uL total volume) 1h prior to testing, rendering only DREADDs animals chemogenetically  
589 inactivated by CNO. Behavioral testing was performed during the light cycle. Animals were

590 placed in the maze for a single, 5min trial in which the location of the center of the animal's  
591 body was measured by AnyMaze Behavior Tracking Software (Stoelting, Wood Dale, IL). The  
592 apparatus was cleaned with 10% ethanol in between animals. During the trial, the number of  
593 open zone entries and total time spent in open sections (defined as body center in open sections)  
594 were measured, which are each indicators of anxiety-like behavior in this procedure. A diagram  
595 of the zero maze apparatus is included in Fig. 3G.

596

### 597 **Open field**

598 An open field test was used to evaluate general levels of locomotor activity. The  
599 apparatus used for the open field test was an opaque gray plastic bin (60cm × 56cm), which was  
600 positioned on a flat table in an isolated room with a camera directly above the center of the  
601 apparatus. Desk lamps were positioned to provide indirect lighting to all corners of the maze  
602 such that the lighting in the box uniformly measured 30 lux throughout. All animals received an  
603 ICV 18mmol infusion of CNO (2uL total volume) 1h prior to testing rendering only DREADDs  
604 animals chemogenetically inactivated by CNO. Behavioral testing began at dark onset. At the  
605 start of the 10min test, each animal was placed in the open field apparatus in the same corner  
606 facing the center of the maze. The location of the center of the animal's body was measured with  
607 the AnyMaze Behavior Tracking Software (Stoelting, Wood Dale, IL). Total distance traveled  
608 was measured by tracking movement from the center of the animal's body throughout the test.

609

### 610 **Immunohistochemistry**

611 Rats were anesthetized via an intramuscular injection of an anesthesia cocktail (ketamine  
612 90mg/kg BW xylazine, 2.8mg/kg BW and acepromazine and 0.72mg/kg BW) then transcardially  
613 perfused with 0.9% sterile saline (pH 7.4) followed by 4% paraformaldehyde (PFA) in 0.1M  
614 borate buffer (pH 9.5; PFA). Brains were dissected from the skull and post-fixed in PFA with  
615 15% sucrose for 24h, then flash frozen in isopentane cooled in dry ice. Brains were sectioned to  
616 30µm thickness on a freezing microtome. Sections were collected in 5-series and stored in  
617 antifreeze solution at -20°C until further processing. General fluorescence IHC labeling  
618 procedures were performed as follows. The antibodies and dilutions that were used are as  
619 follows: [1] For lesion histology using the neuron-specific protein NeuN, the rabbit anti-NeuN  
620 primary antibody (1:1000, Abcam) was used followed by a donkey anti-rabbit conjugated to

621 AF488 (1:500, Jackson ImmunoResearch). [2] To amplify the native tdTomato signal for  
622 neuroanatomical tracing or DREADDs histology, the rabbit anti-RFP primary antibody (1:2000,  
623 Rockland) was used followed by a donkey anti-rabbit conjugated to Cy3 (1:500, Jackson  
624 ImmunoResearch). [3] To amplify the native GFP signal for LS injection site histology, the  
625 chicken anti-GFP primary antibody (1:500, Abcam) was used followed by a donkey anti-chicken  
626 secondary antibody conjugated to AF488 (1:500, Jackson ImmunoResearch). Antibodies were  
627 prepared in 0.02M potassium phosphate buffered saline (KPBS) solution containing 0.2% bovine  
628 serum albumin and 0.3% Triton X-100 at 4 °C overnight. After thorough washing with 0.02M  
629 KPBS, sections were incubated in secondary antibody solution. All secondary antibodies were  
630 obtained from Jackson ImmunoResearch and used at 1:500 dilution at 4°C, with overnight  
631 incubations (Jackson ImmunoResearch; West Grove, PA, USA). Sections were mounted and  
632 coverslipped using 50% glycerol in 0.02 M KPBS and the edges were sealed with clear nail  
633 polish. Photomicrographs were acquired using a Nikon 80i (Nikon DSQI1,1280X1024  
634 resolution, 1.45 megapixel) under epifluorescence or darkfield illumination.

635

### 636 **Axon mapping**

637 Data were entered using a custom built data-entry platform (Axiome C, created by JDH)  
638 built around Microsoft Excel software and designed to facilitate entry of data points for all gray  
639 matter regions across their atlas levels as described in a rat brain reference atlas (53). The  
640 Axiome C approach was used previously to facilitate the analysis of brain gene-expression data  
641 (62). An ordinal scale, ranging from 0 (absent) to 7 (very strong), was used to record the  
642 qualitative weight of anterograde labeling. An average value was then obtained for each region  
643 across its atlas levels for which data were available. The data were summarized graphically for a  
644 representative experiment on a brain flatmap summary diagram (adapted from (58)). The data are  
645 also summarized in tabular form in Supplementary Table 1.

646

### 647 **Statistics**

648 Data are expressed as mean +/- SEM. Differences were considered to be statistically  
649 significant at  $p < 0.05$ . All variables were analyzed using the advanced analytics software package  
650 Statistica (StatSoft, Tulsa, OK, USA). For all measures of food intake, body weight, and  
651 errors/latency during spatial foraging and spatial escape task training, differences between

652 groups were evaluated using two-way repeated measures ANOVAs (treatment x time). For  
653 lesion experiments, measures during spatial foraging and spatial escape task probes, differences  
654 between groups were evaluated using two-tailed independent two-sample Student's t-tests. For  
655 CA1v to LS disconnection experiments, measures during spatial foraging and spatial escape task  
656 probes, the STFP paradigm, the zero maze paradigm, and the open field test, differences between  
657 groups were evaluated using one-way ANOVAs. Significant ANOVAs were analyzed with a  
658 Fisher's LSD posthoc test where appropriate. Outliers were identified as being more extreme  
659 than the median +/- 1.5 \* interquartile range. For all experiments, assumptions of normality,  
660 homogeneity of variance (HOV), and independence were met where required.

661

#### 662 **CONFLICT OF INTEREST**

663 No conflicts of interest.

664

#### 665 **ACKNOWLEDGEMENTS**

666 This work was supported by National Institute of Diabetes and Digestive and Kidney Diseases  
667 grants: DK104897 to SEK, DK118944 to CML, and DK116558 to ANS. Clozapine-N-Oxide  
668 was kindly provided by the National Institute of Mental Health. The authors are grateful to the  
669 Kanoski lab undergraduates for their assistance in behavioral experiments and histology.

670

671

# Figure 1

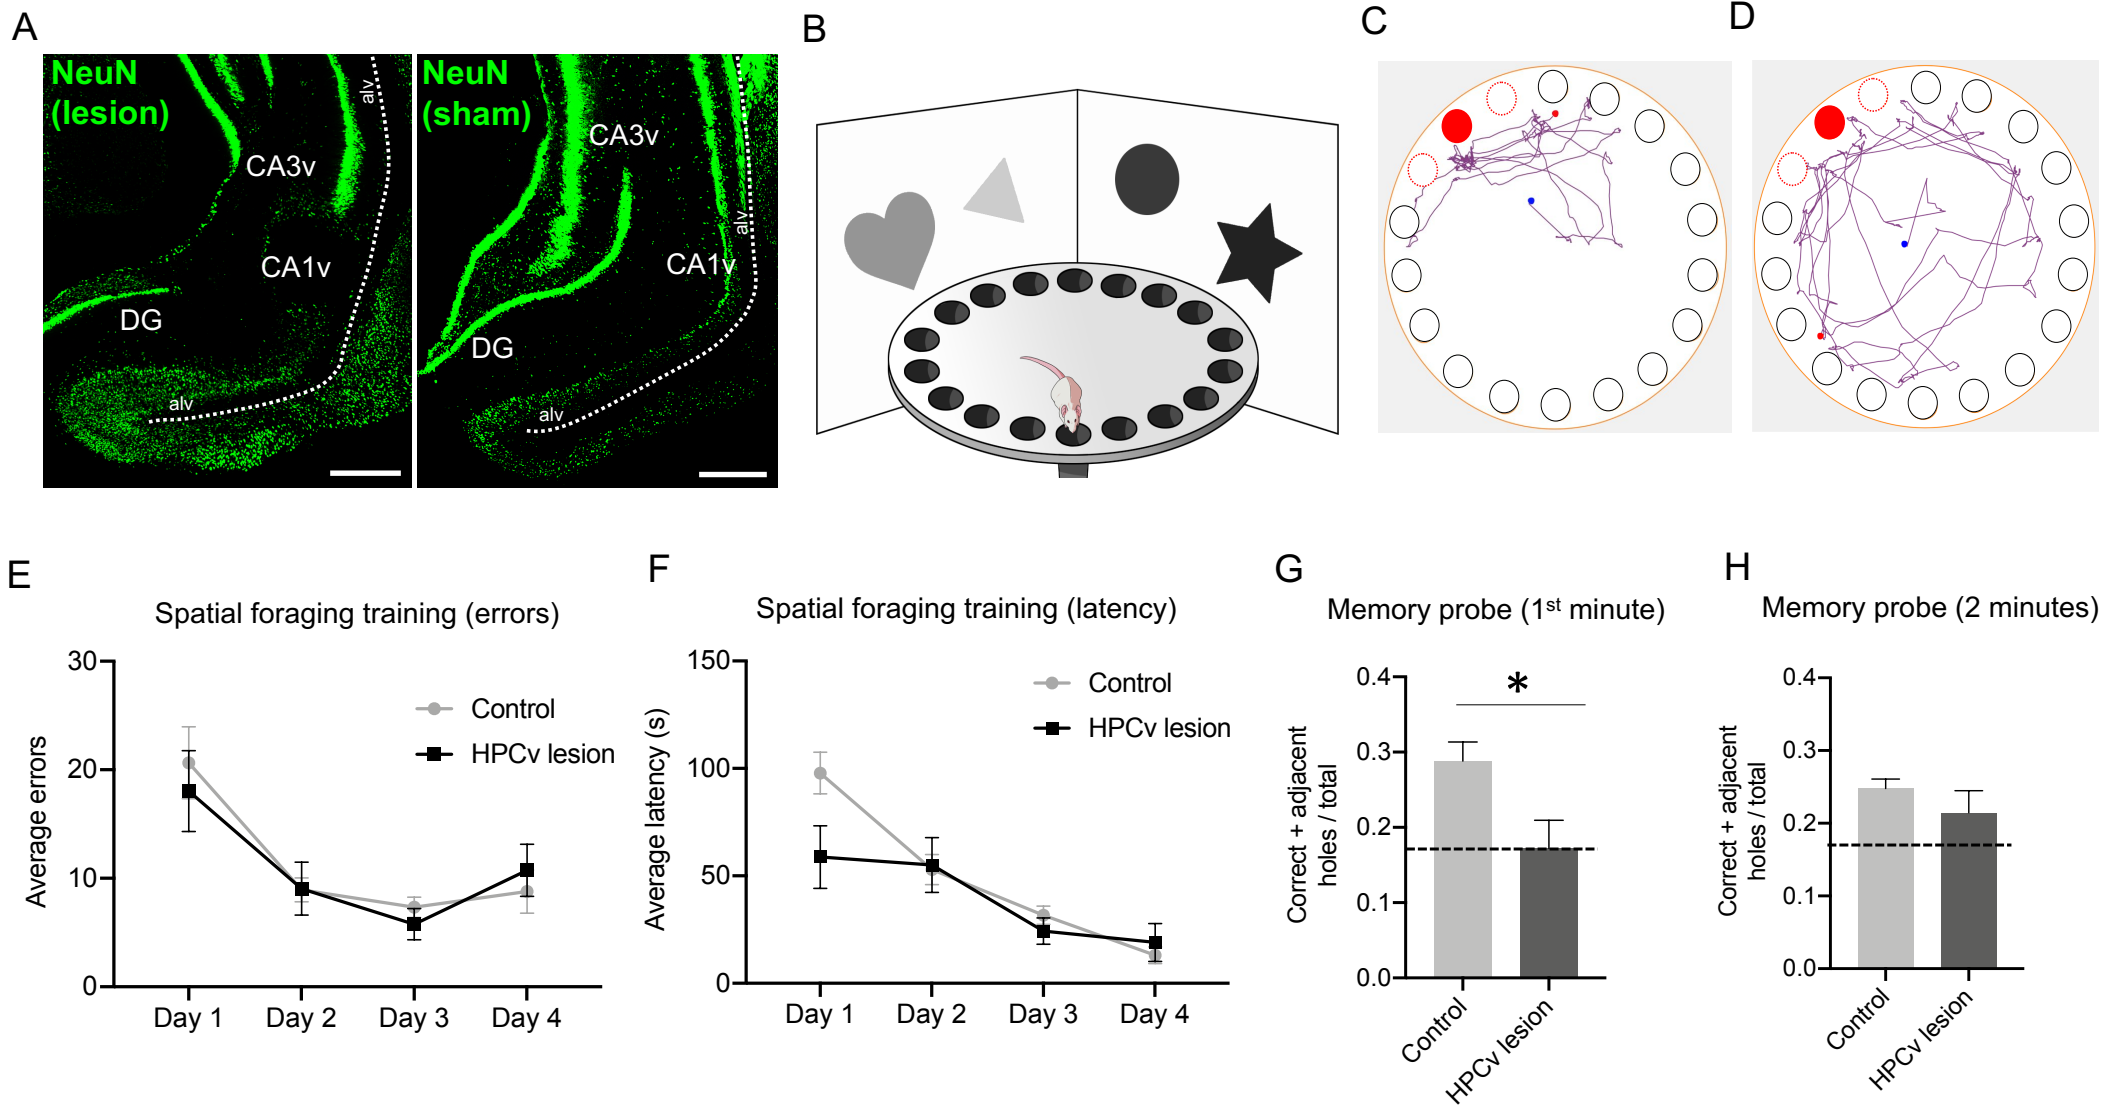



672 **Figure 1. Bilateral HPCv lesions impair spatial memory for food location.** Representative  
673 HPCv lesion histology with NeuN immunohistochemistry (A; scale bars 500 $\mu$ m). Spatial  
674 foraging task apparatus (B). Representative navigation paths of a control animal preferentially  
675 investigating correct (filled red) and adjacent holes (outlined orange) during spatial foraging  
676 memory probe (C). Representative navigation path of HPCv lesioned animal during spatial  
677 foraging memory probe (D). Bilateral HPCv lesions did not impair learning of the spatial  
678 foraging task compared to controls, as measured by errors before locating correct hole during  
679 task training (E) and latency to locate correct hole during task training (F). Bilateral HPCv  
680 lesions impaired retention of the spatial foraging task, as measured by the ratio of investigation  
681 of correct plus adjacent holes over total investigated during the first minute of the task ( $p < 0.05$ ;  
682 G). There were no group differences observed when evaluated over the entire two minutes of the  
683 task (H). Dotted line indicates chance performance level (0.167). For graphs 1D-G, lesion  $n = 11$ ,  
684 control  $n = 18$ . All values expressed as mean  $\pm$  SEM.

685

686

# Figure 2

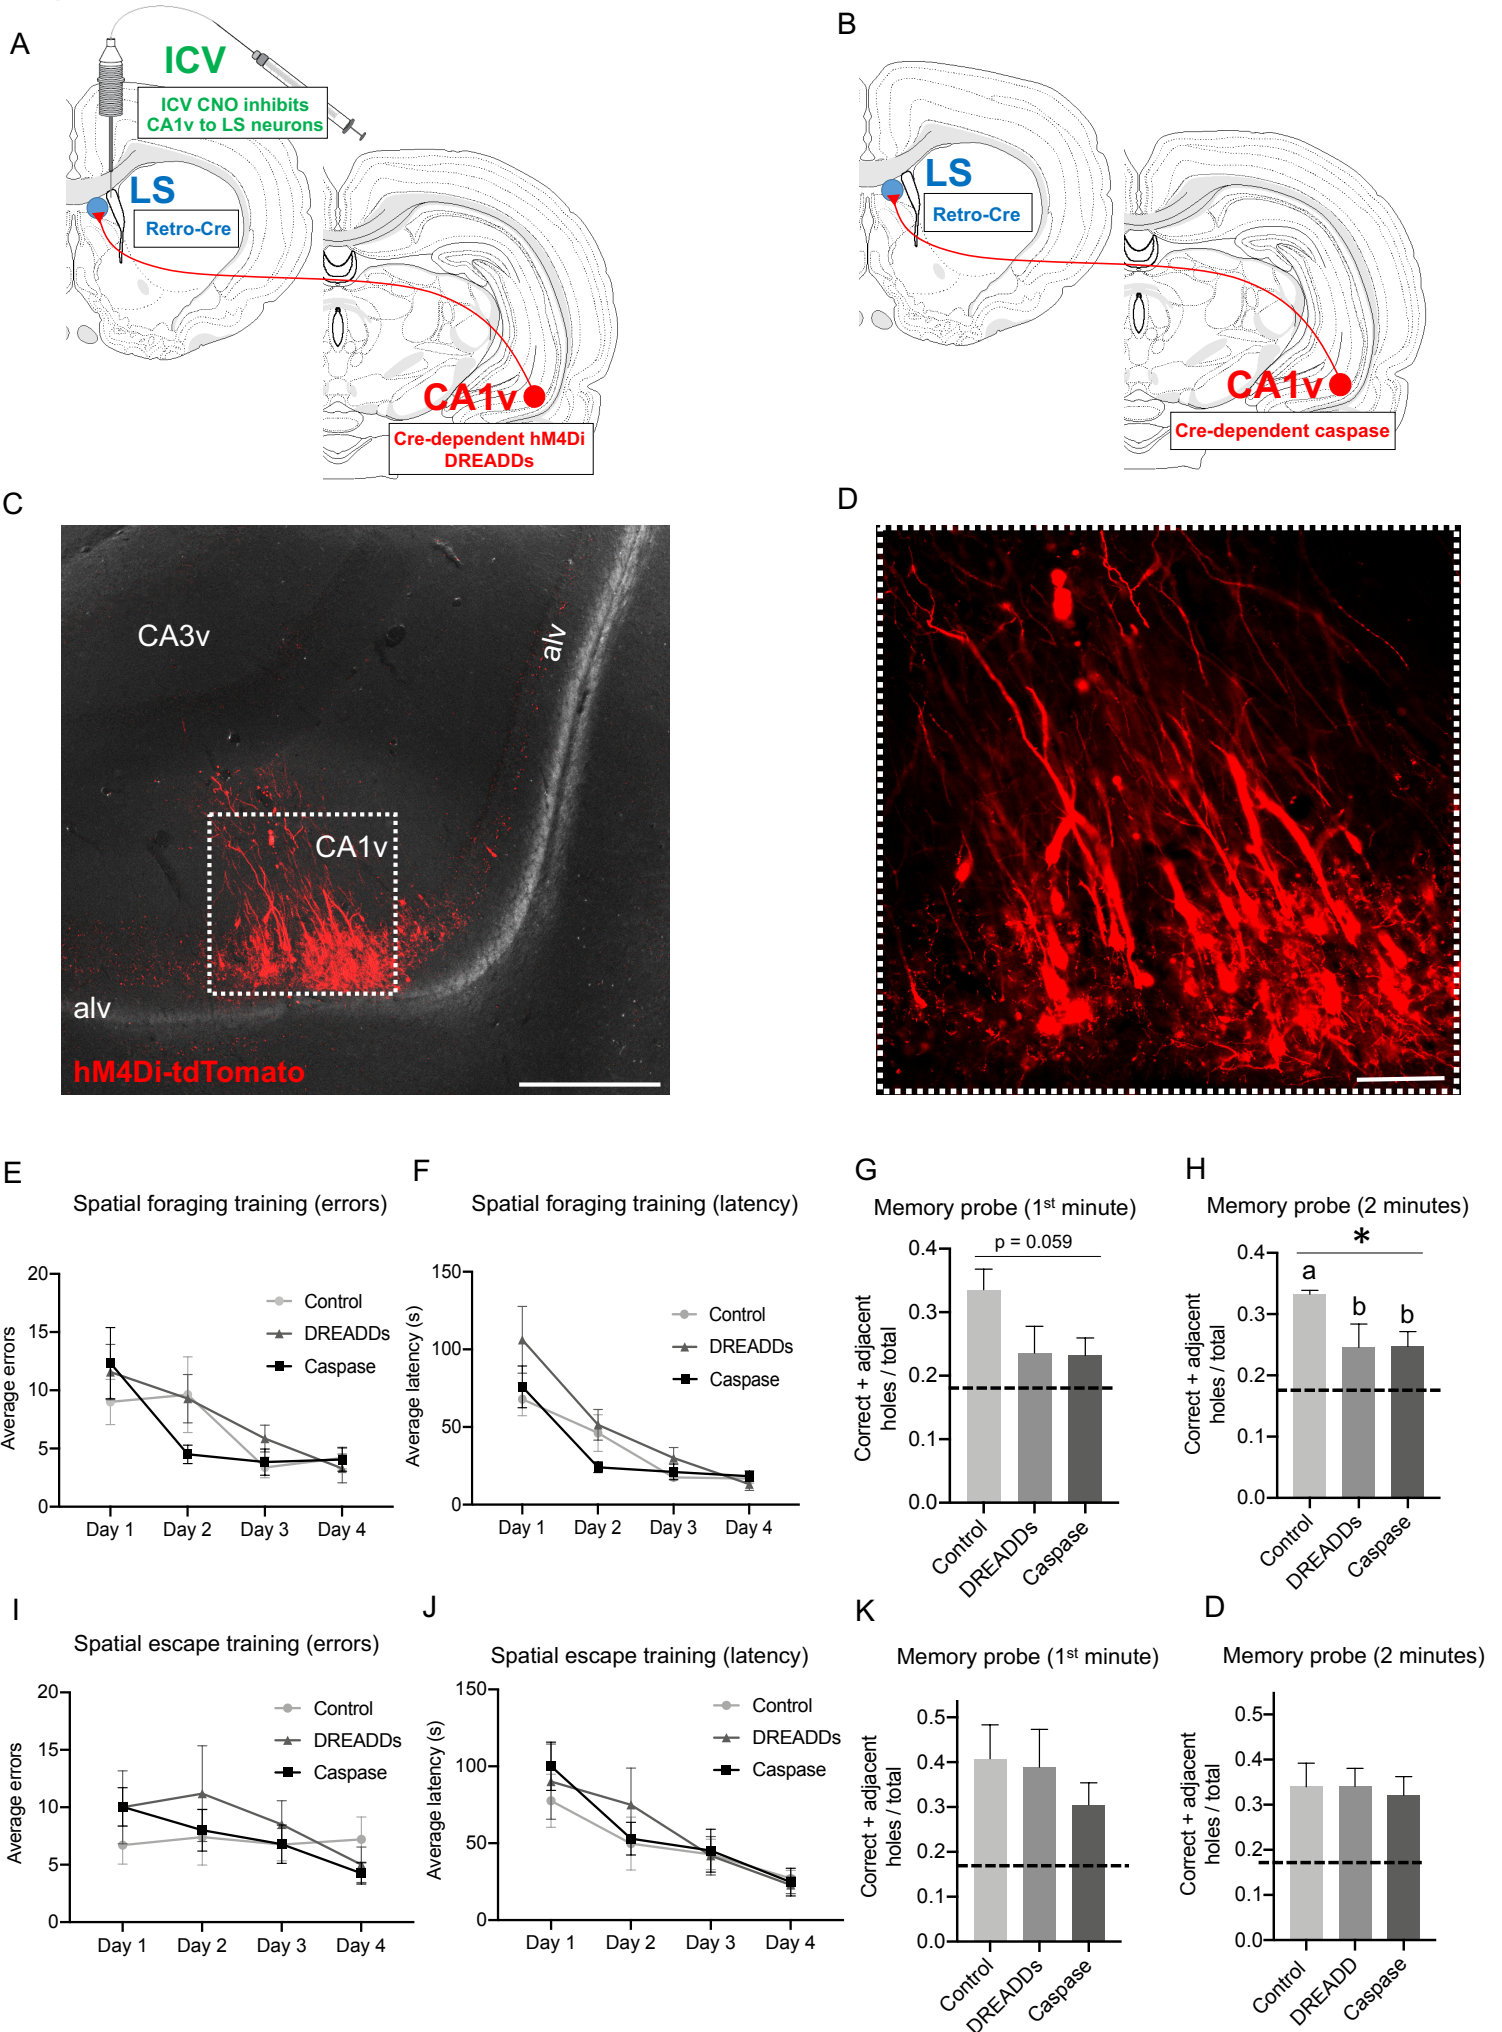

687 **Figure 2. Reversible and chronic CA1v to LS neural disconnection impairs spatial memory**  
688 **for food location but not for escape location.** Diagram of dual viral approach using a cre-  
689 dependent inhibitory DREADDs approach to reversibly disconnect CA1v to LS neural pathway  
690 (A). Diagram of dual viral approach using a cre-dependent caspase approach to chronically  
691 disconnect CA1v to LS neural pathway (B). Representative injection site in CA1v demonstrating  
692 LS-projecting neurons infected with inhibitory DREADDs, which simultaneously drives  
693 expression of a fluorescent tdTomato transgene (C, D; scale bars 500 $\mu$ m and 100 $\mu$ m,  
694 respectively). Neither reversible (DREADDs) nor chronic (caspase) disconnection of the CA1v  
695 to LS pathway impaired learning of the spatial foraging task compared to controls, as measured  
696 by errors before correct hole during task training (E) and latency to correct hole during task  
697 training (F). Both reversible and chronic disconnection of the CA1v to LS pathway impaired  
698 retention of the spatial memory foraging task as measured by the ratio of investigation of correct  
699 plus adjacent holes over total investigations during entire two minutes of the task ( $p < 0.05$ ; H).  
700 During the first minute of the task, there was a trend toward impaired learning in the  
701 disconnection groups, but this effect did not reach statistical significance ( $p = 0.059$ ; G). In  
702 contrast, disconnection of the CA1v to LS pathway either reversibly (DREADDs) or chronically  
703 (caspase) did not impair performance on the spatial escape task. There were no differences in  
704 learning as measured by errors before correct hole during task training (I) and latency to correct  
705 hole during task training (J). Unlike the spatial foraging task, retention of the spatial escape task  
706 was not impaired by reversible nor chronic disconnection of the CA1v to LS pathway (K, L). For  
707 graphs 2E-H (CA1v to LS disconnect cohort 1), DREADDs  $n = 6$ , caspase  $n = 10$ , control  $n = 8$ . For  
708 graphs 2I-L (CA1v to LS disconnect cohort 2), DREADDs  $n = 8$ , caspase  $n = 12$ , control  $n = 10$ .  
709 Dotted line indicates chance performance level (0.167). All values expressed as mean  $\pm$  SEM.  
710  
711

# Figure 3

A

Day 1

Demonstrators and observers habituate to social interaction

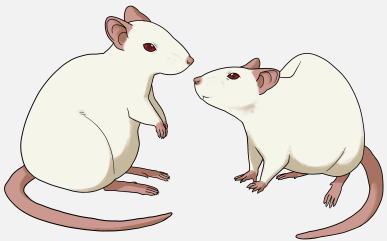

Day 2

Demonstrators consume flavored chow (chow A) prior to social interaction

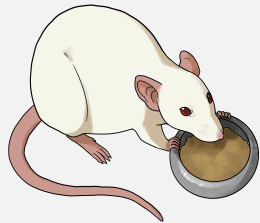

Demonstrators and observers have a 30min social interaction

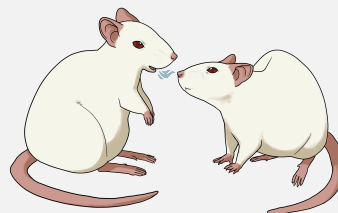

Day 3

Food-restricted observers are given a 60min flavor preference test (chow A vs. novel chow B)

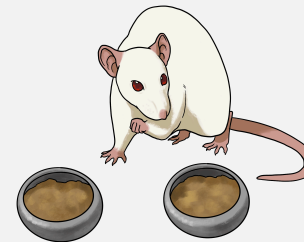

B

Social transmission of food preference

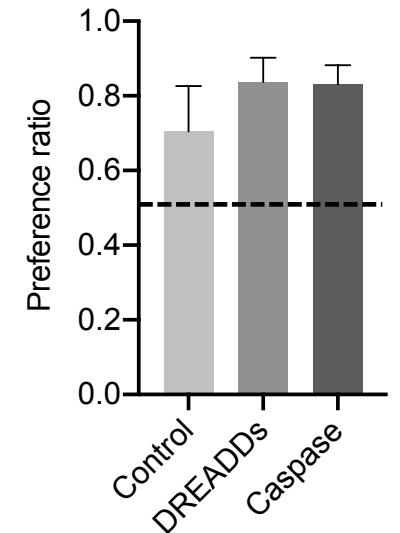

C

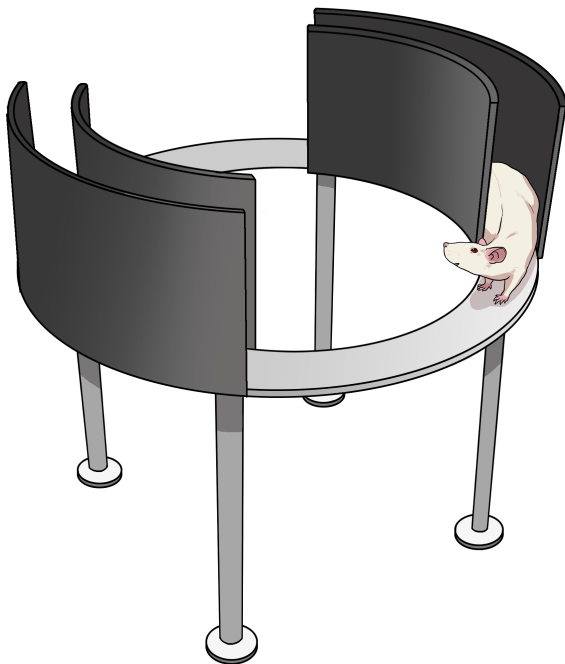

D

Zero maze:  
Open zone time

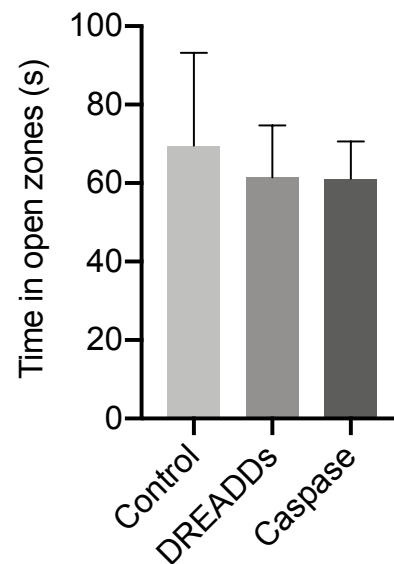

E

Zero maze:  
Open zone entries

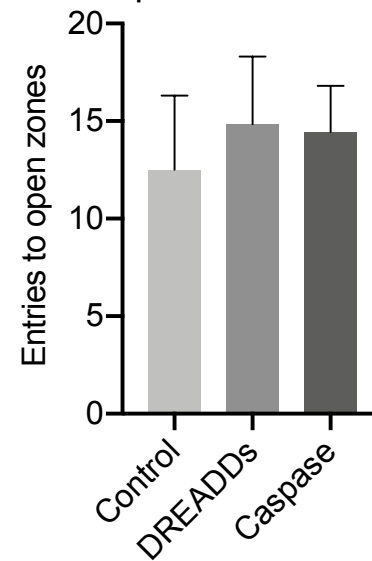

F

Open field

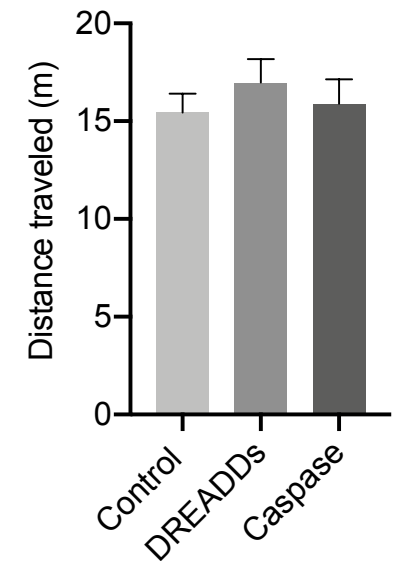

712 **Figure 3. Neither reversible nor chronic CA1v to LS neural disconnection impair spatial**  
713 **memory for escape location, social transmission of food preference, anxiety-like behavior,**  
714 **or general locomotor activity levels.** Diagram of the social transmission of food preference  
715 (STFP) task (A). Neither reversible nor chronic disconnection of the CA1v to LS pathway impair  
716 STFP learning compared to controls, as measured by a food preference ratio (B), with the dotted  
717 line indicating chance preference level (0.50). Diagram of the zero maze apparatus (C). Anxiety-  
718 like behavior was not influenced by reversible or chronic disconnection of the CA1v to LS  
719 pathway compared to controls, as measured by performance in the zero maze task, specifically  
720 time in open zones (D) and entries into open zones (E). Neither chronic nor reversible CA1v to  
721 LS disconnection affected open field performance compared to controls, as measured by total  
722 distance traveled (F). For graphs 3B, 3D, and 3E (CA1v to LS disconnect cohort 1), DREADDs  
723 n=6, caspase n=10, control n=8. For graph 3F (CA1v to LS disconnect cohort 2), DREADDs  
724 n=8, caspase n=12, control n=10. All values expressed as mean +/- SEM.  
725  
726

# Figure 4

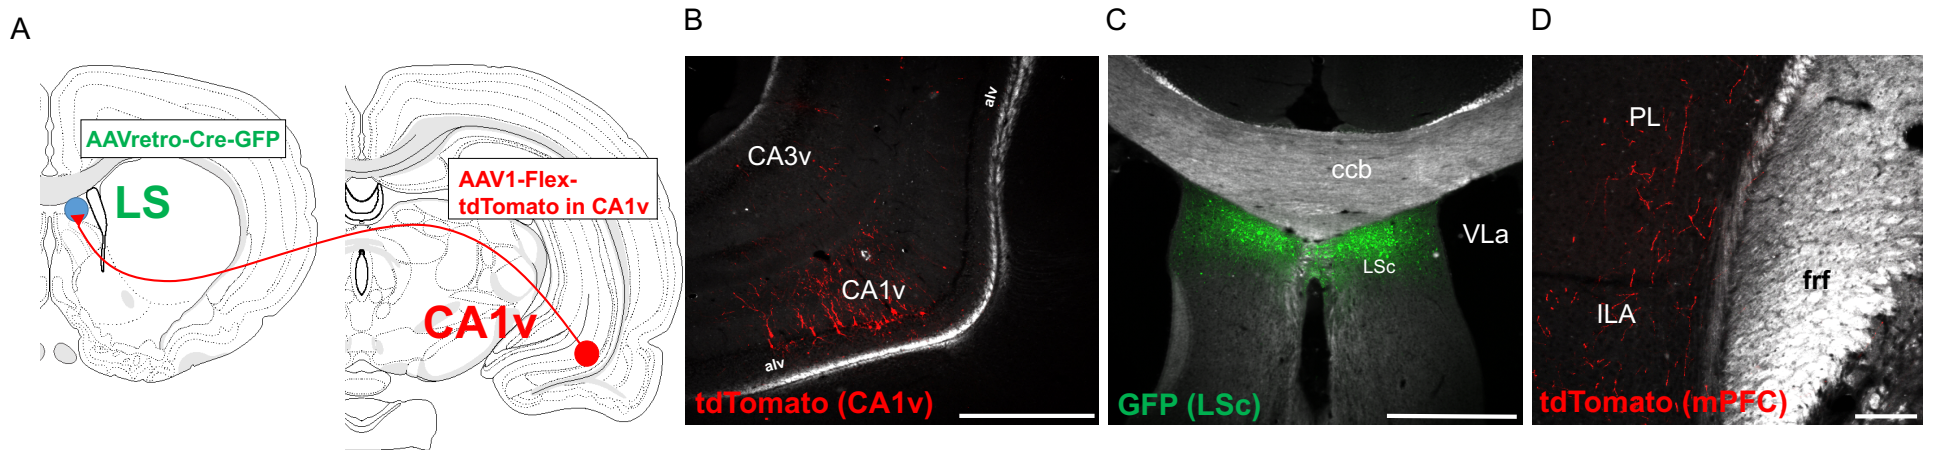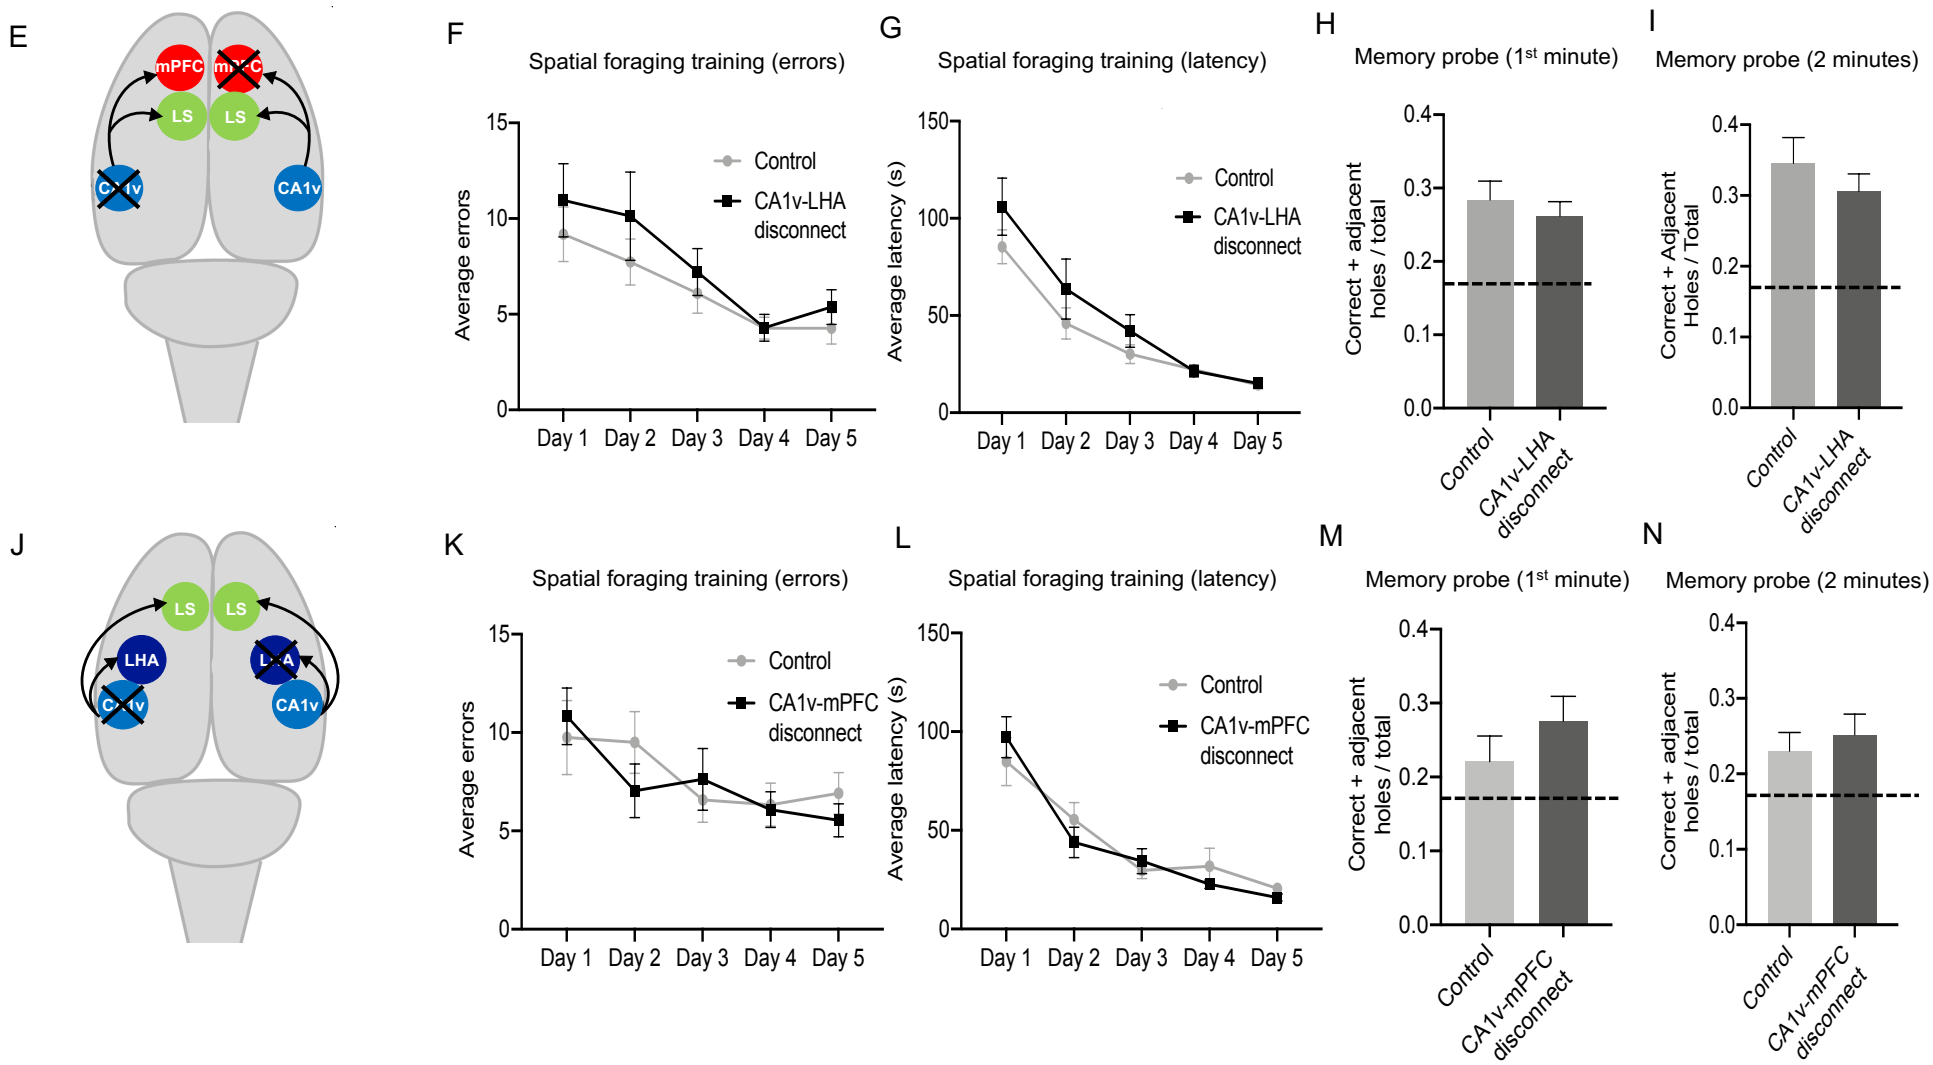

727 **Figure 4. Neither CA1v to mPFC nor CA1v to LHA disconnection impairs spatial memory**  
728 **for food location.** Diagram of dual viral approach to identify collateral targets of the CA1v to  
729 LS neural pathway (A). Representative CA1v injection site from collateral identification  
730 approach (B; scale bar 500 $\mu$ m). Representative LS injection site from collateral identification  
731 approach (C; scale bar 500 $\mu$ m). Representative image collateral axons of the CA1v to LS  
732 pathway located in the mPFC (D; scale bar 50 $\mu$ m). Diagram of contralesional approach to  
733 functionally disconnect the CA1v to mPFC neural pathway (E). Disconnection of the CA1v to  
734 mPFC neural pathway did not influence learning of the spatial foraging task compared to  
735 controls, as measured by errors before correct hole during training (F) and latency to correct hole  
736 during training (G). Disconnection of the CA1v to mPFC pathway did not influence retention of  
737 the spatial foraging task, as measured by during the first minute (H) and entire two minutes (I) of  
738 the memory probe. Diagram of contralesional approach to functionally disconnect the CA1v to  
739 LHA neural pathway (J). Disconnection of the CA1v to LHA neural pathway did not influence  
740 learning of the spatial foraging task compared to controls, as measured by errors before correct  
741 hole during training (K) and latency to correct hole during training (L). Disconnection of the  
742 CA1v to LHA pathway did not influence retention of the spatial foraging task, as measured by  
743 correct plus adjacent holes over total holes investigated during the first minute (M) and entire  
744 two minutes (N) of the memory probe. For graphs 4F-I, CA1v to mPFC disconnect n=12, control  
745 n=12. For graphs 4K-N, CA1v to LHA disconnect n=12, control n=11. All values expressed as  
746 mean +/- SEM.

747

748

**Figure 5**

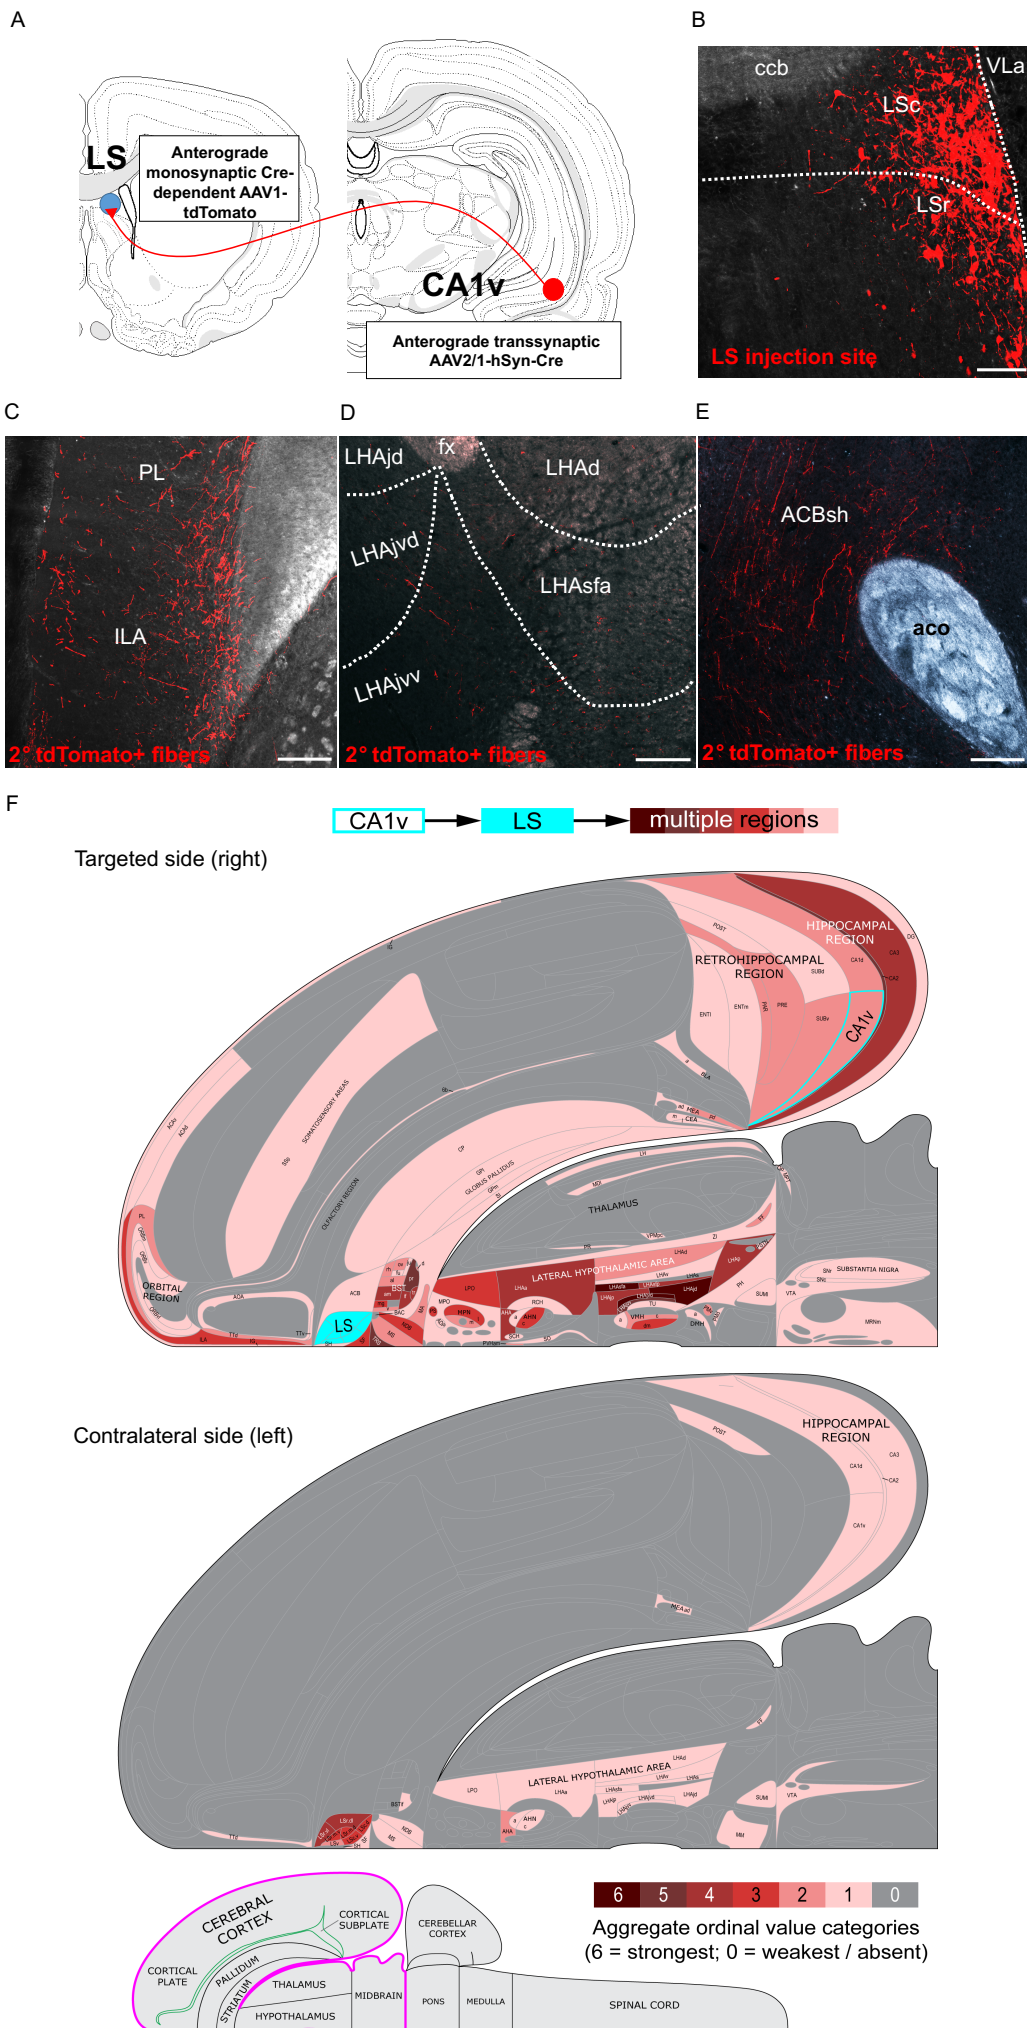



749 **Figure 5. Identification of second-order neural projections downstream of CA1v to LS**  
750 **projections.** Diagram of dual viral approach to identify brain regions that are second-order (2°)  
751 targets of the CA1v to LS neural pathway (A). Representative LS injection site from second  
752 order identification approach (B; scale bar 100µm). Representative image of second-order fibers  
753 of the CA1v to LS pathway within the mPFC (C; scale bar 200µm). Representative image of  
754 second-order fibers of the CA1v to LS pathway within the LHA (D; scale bar 200µm).  
755 Representative image of second-order fibers of the CA1v to LS pathway within the ACB (E;  
756 scale bar 200µm). Summary of the projection targets of LS neurons that receive input from  
757 CA1v (F). The outputs of the right side of LS neurons receiving CA1v input are represented at  
758 the macroscale (gray matter region resolution) on a partial flatmap representation of the rat  
759 forebrain, adapted from (58). Connection weights are represented block colors for each region  
760 following an ordinal scale ranging from weakest (0 = very weak or absent) to strongest (6 =  
761 strong), as there were no 7 (very strong) values. The inset at lower left represents one side of the  
762 brain with the part represented in the upper diagrams outlined in magenta.

763

764

765 **SUPPLEMENTARY INFORMATION**

766

767

# Supplemental Figure 1

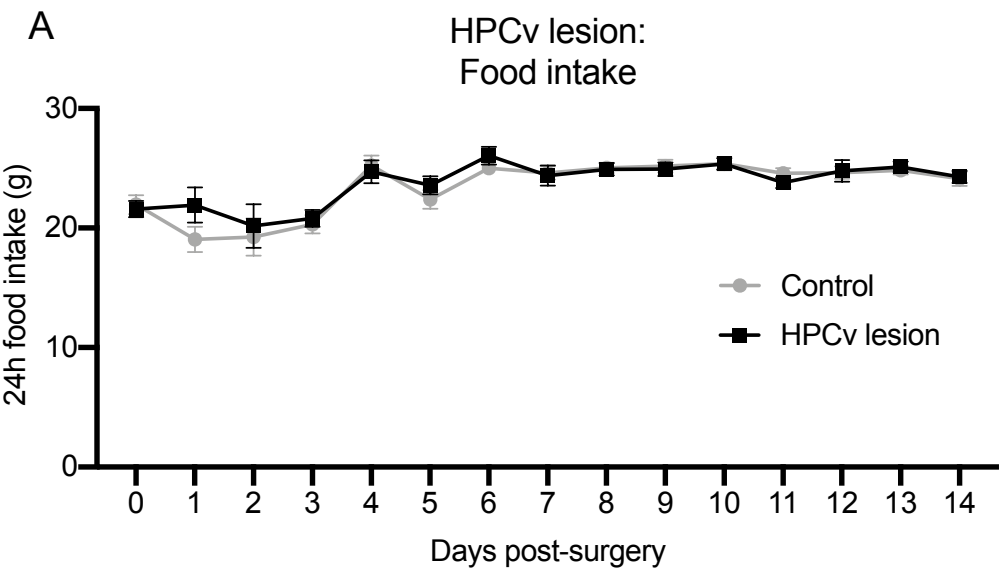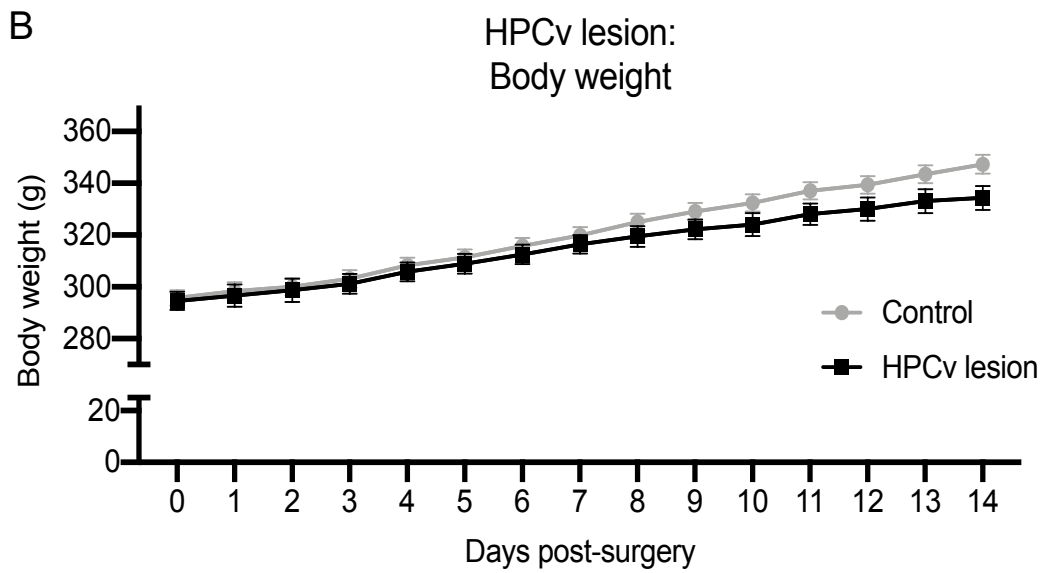

768 **Supplementary Figure 1. Effect of bilateral HPCv lesions on food intake and body weight.**

769 There were no effects on food intake (A) or body weight (B) of bilateral HPCv lesions compared  
770 to controls. Lesion n = 11, control n = 18. All values expressed as mean +/- SEM.

771

772

# Supplemental Figure 2

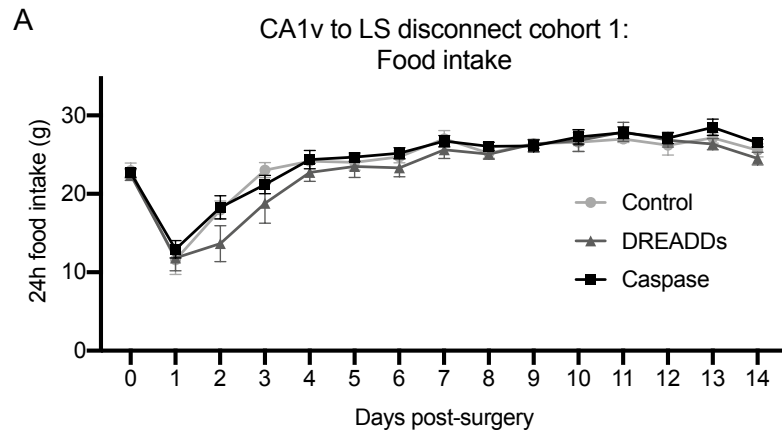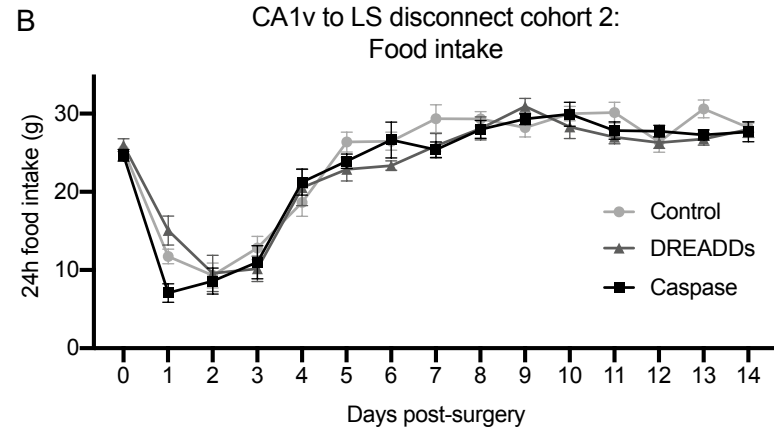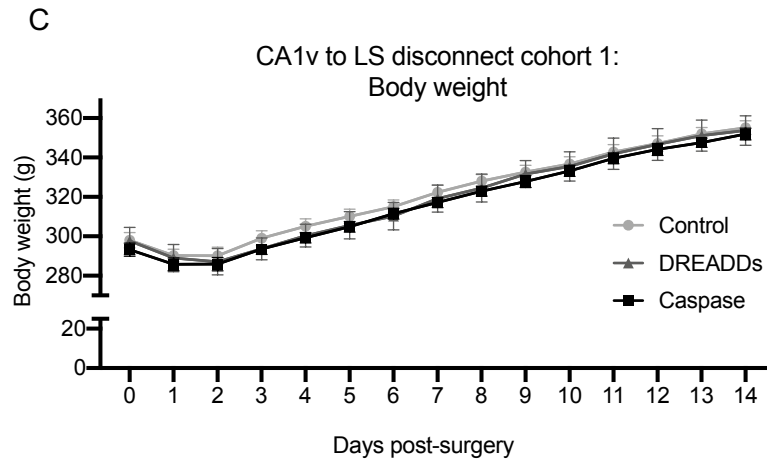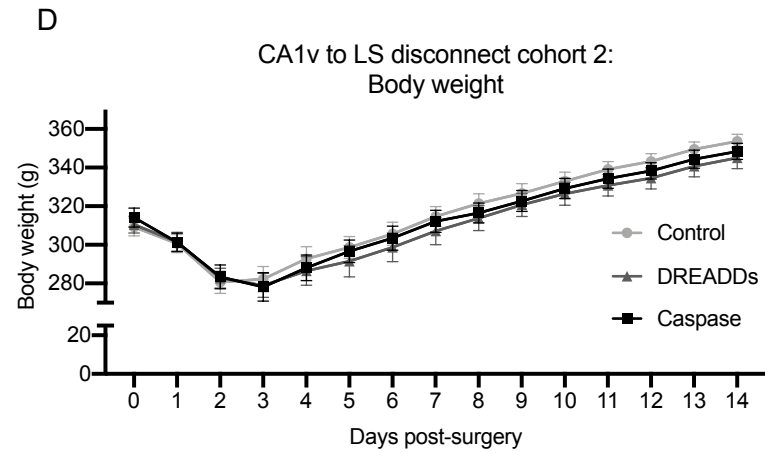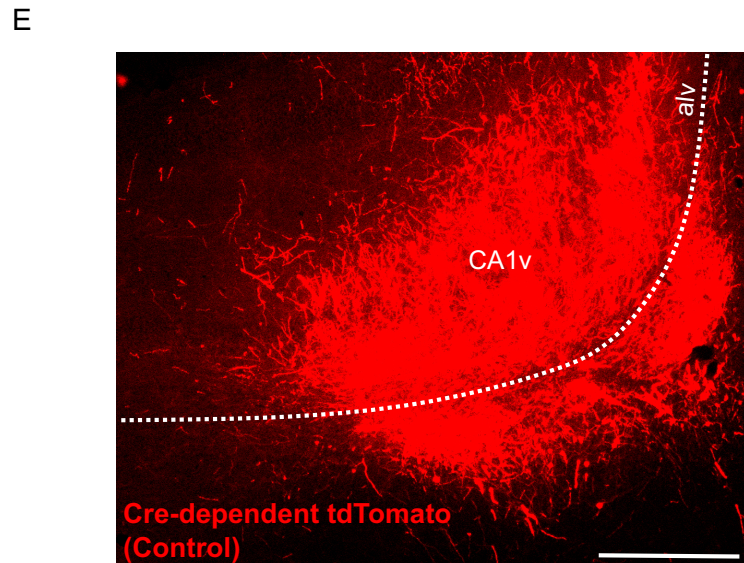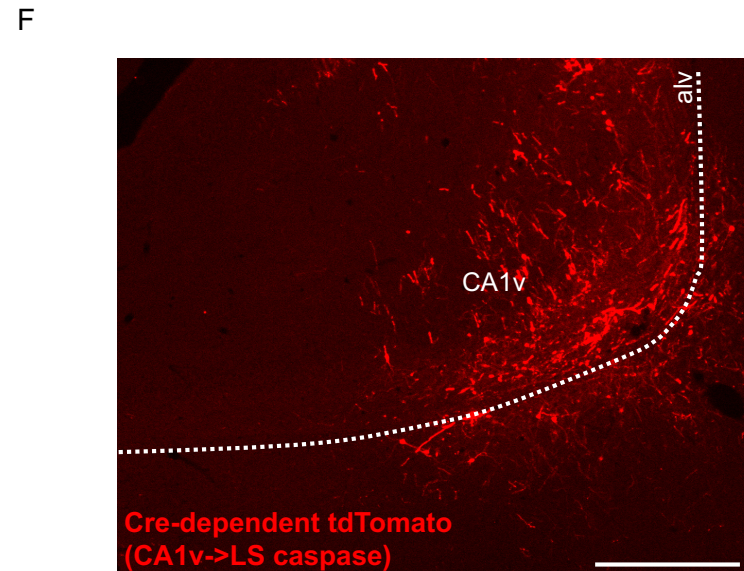

773 **Supplementary Figure 2. Effect of reversible and chronic disconnection of the CA1v to LS**  
774 **neural pathway on food intake and body weight, and verification of the chronic approach.**

775 There were no effects on food intake (cohort 1: A; cohort 2: B) or body weight (cohort 1: C;  
776 cohort 2: D) of reversible (DREADDs) or chronic (caspase) disconnection of the CA1v to LS  
777 neural pathway compared to controls. Histological verification of the dual viral approach  
778 demonstrates that cre-dependent tdTomato labeling of CA1v neurons induced by LS-origin retro-  
779 cre is robust in a control animal (E), but reduced in an animal injected with cre-dependent  
780 caspase combined with cre-dependent tdTomato due to caspase-induced cell death (F). For  
781 graphs S1A-B (CA1v to LS disconnect cohort 1), DREADDs n=6, caspase n=10, control n=8.  
782 For graphs S1C-D (CA1v to LS disconnect cohort 2), DREADDs n=8, caspase n=12, control  
783 n=10. All values expressed as mean +/- SEM.

784

785

# Supplemental Figure 3

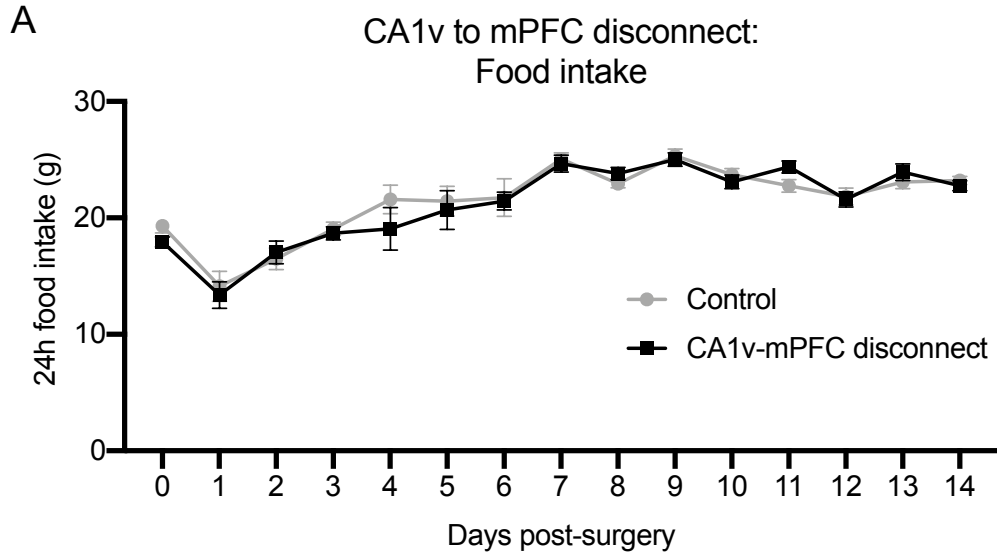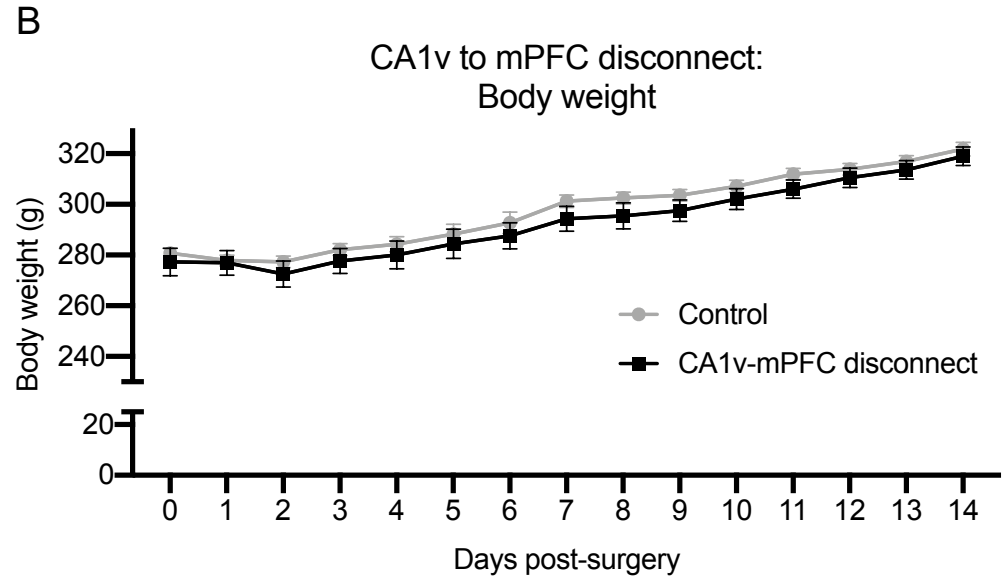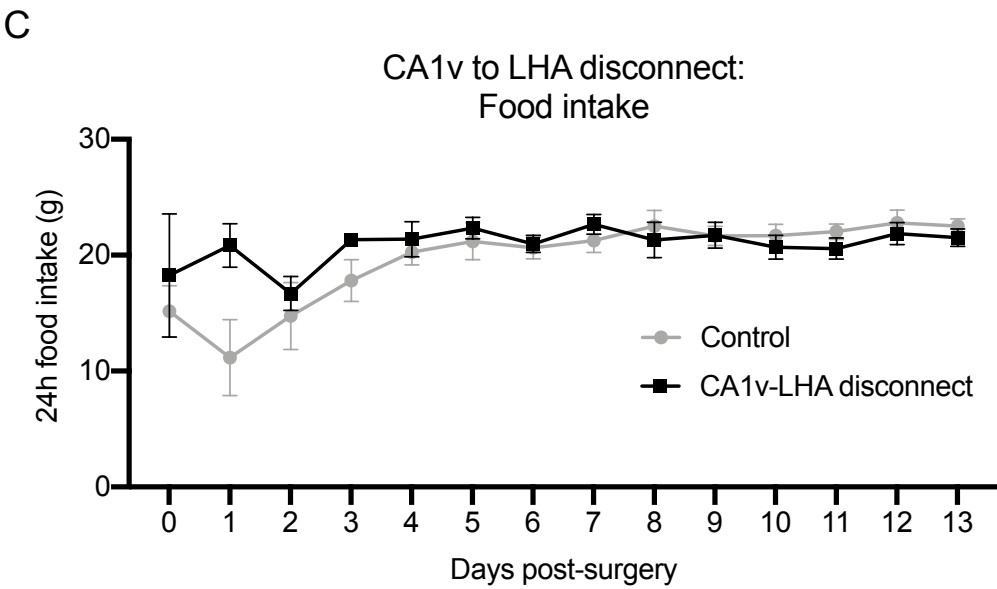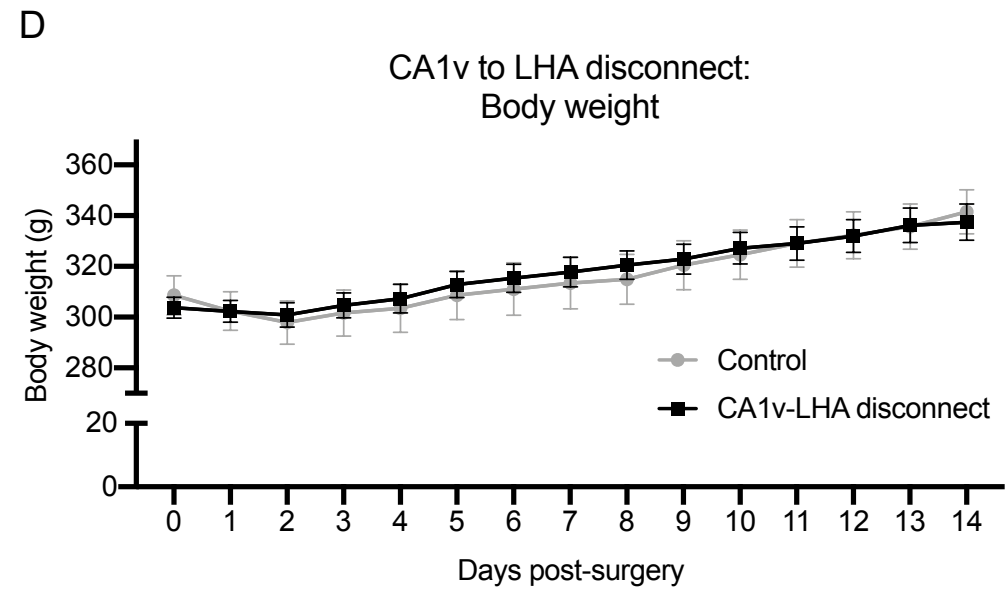

786 **Supplementary Figure 3. Effect of contralesional disconnection methods on food intake and**  
787 **body weight.** There were no effects on food intake (A) or body weight (B) of contralesional  
788 CA1v to mPFC compared to controls. CA1v to mPFC disconnect n=12, control n=12. There  
789 were no effects on food intake (C) or body weight (D) of contralesional CA1v to LHA compared  
790 to controls. CA1v to LHA disconnect n=12, control n=11. All values expressed as mean +/-  
791 SEM.

792

793





794 **Supplementary Table 1.** Summary table of the forebrain projection targets of LS neurons that  
795 receive input from CA1v (derived the same raw data as the brain flatmap summary diagram in  
796 Fig. 5F).

797

798

800

- 801 1. R. G. M. Morris, U. Frey, "Hippocampal synaptic plasticity: Role in spatial learning or the  
802 automatic recording of attended experience?" in Burgess, Neil (Ed); Jeffery, Kathryn J  
803 (Ed); et al (1999) *The hippocampal and parietal foundations of spatial cognition*. (Oxford  
804 University Press, U Edinburgh, Ctr for Neuroscience, Edinburgh, Scotland London, 1999),  
805 pp. 220-246.
- 806 2. D. C. Rowland, Y. Roudi, M. B. Moser, E. I. Moser, Ten Years of Grid Cells. *Annu Rev*  
807 *Neurosci* **39**, 19-40 (2016).
- 808 3. R. Morris, Developments of a water-maze procedure for studying spatial learning in the  
809 rat. *Journal of neuroscience methods* **11**, 47-60 (1984).
- 810 4. C. A. Barnes, Memory deficits associated with senescence: a neurophysiological and  
811 behavioral study in the rat. *J Comp Physiol Psychol* **93**, 74-104 (1979).
- 812 5. J. O'Keefe, J. Dostrovsky, The hippocampus as a spatial map: preliminary evidence from  
813 unit activity in the freely-moving rat. *Brain research* (1971).
- 814 6. T. Hafting, M. Fyhn, S. Molden, M. B. Moser, E. I. Moser, Microstructure of a spatial map  
815 in the entorhinal cortex. *Nature* **436**, 801-806 (2005).
- 816 7. M. S. Fanselow, H.-W. Dong, Are the dorsal and ventral hippocampus functionally  
817 distinct structures? *Neuron* **65**, 7-19 (2010).
- 818 8. A. T. Keinath *et al.*, Precise spatial coding is preserved along the longitudinal  
819 hippocampal axis. *Hippocampus* **24**, 1533-1548 (2014).
- 820 9. K. B. Kjelstrup *et al.*, Finite scale of spatial representation in the hippocampus. *Science*  
821 **321**, 140-143 (2008).
- 822 10. L. de Hoz, J. Knox, R. G. Morris, Longitudinal axis of the hippocampus: both septal and  
823 temporal poles of the hippocampus support water maze spatial learning depending on  
824 the training protocol. *Hippocampus* **13**, 587-603 (2003).
- 825 11. J. Ferbinteanu, C. Ray, R. J. McDonald, Both dorsal and ventral hippocampus contribute  
826 to spatial learning in Long-Evans rats. *Neurosci Lett* **345**, 131-135 (2003).
- 827 12. M. B. Moser, E. I. Moser, Functional differentiation in the hippocampus. *Hippocampus* **8**,  
828 608-619 (1998).
- 829 13. S. E. Kanoski, H. J. Grill, Hippocampus Contributions to Food Intake Control: Mnemonic,  
830 Neuroanatomical, and Endocrine Mechanisms. *Biol Psychiatry* **81**, 748-756 (2017).
- 831 14. P. G. Henke, Hippocampal pathway to the amygdala and stress ulcer development. *Brain*  
832 *Res Bull* **25**, 691-695 (1990).
- 833 15. K. G. Kjelstrup *et al.*, Reduced fear expression after lesions of the ventral hippocampus.  
834 *Proceedings of the National Academy of Sciences* **99**, 10825-10830 (2002).
- 835 16. S. Gaskin, A. Gamliel, M. Tardif, E. Cole, D. G. Mumby, Incidental (unreinforced) and  
836 reinforced spatial learning in rats with ventral and dorsal lesions of the hippocampus.  
837 *Behav Brain Res* **202**, 64-70 (2009).
- 838 17. M. S. Bienkowski *et al.*, Integration of gene expression and brain-wide connectivity  
839 reveals the multiscale organization of mouse hippocampal networks. *Nat Neurosci* **21**,  
840 1628-1643 (2018).

- 841 18. R. Hannapel *et al.*, Postmeal Optogenetic Inhibition of Dorsal or Ventral Hippocampal  
842 Pyramidal Neurons Increases Future Intake. *eNeuro* **6** (2019).
- 843 19. R. C. Hannapel, Y. H. Henderson, R. Nalloor, A. Vazdarjanova, M. B. Parent, Ventral  
844 hippocampal neurons inhibit postprandial energy intake. *Hippocampus* **27**, 274-284  
845 (2017).
- 846 20. B. K. Mani *et al.*, Neuroanatomical characterization of a growth hormone secretagogue  
847 receptor-green fluorescent protein reporter mouse. *J Comp Neurol* **522**, 3644-3666  
848 (2014).
- 849 21. J. M. Zigman, J. E. Jones, C. E. Lee, C. B. Saper, J. K. Elmquist, Expression of ghrelin  
850 receptor mRNA in the rat and the mouse brain. *J Comp Neurol* **494**, 528-548 (2006).
- 851 22. I. Merchenthaler, M. Lane, P. Shughrue, Distribution of pre-pro-glucagon and glucagon-  
852 like peptide-1 receptor messenger RNAs in the rat central nervous system. *J Comp*  
853 *Neurol* **403**, 261-280 (1999).
- 854 23. S. E. Kanoski, S. M. Fortin, K. M. Ricks, H. J. Grill, Ghrelin signaling in the ventral  
855 hippocampus stimulates learned and motivational aspects of feeding via PI3K-Akt  
856 signaling. *Biol Psychiatry* **73**, 915-923 (2013).
- 857 24. S. E. Kanoski *et al.*, Hippocampal leptin signaling reduces food intake and modulates  
858 food-related memory processing. *Neuropsychopharmacology* **36**, 1859-1870 (2011).
- 859 25. T. M. Hsu *et al.*, A hippocampus to prefrontal cortex neural pathway inhibits food  
860 motivation through glucagon-like peptide-1 signaling. *Mol Psychiatry* **23**, 1555-1565  
861 (2018).
- 862 26. T. M. Hsu, J. D. Hahn, V. R. Konanur, A. Lam, S. E. Kanoski, Hippocampal GLP-1 receptors  
863 influence food intake, meal size, and effort-based responding for food through volume  
864 transmission. *Neuropsychopharmacology* **40**, 327-337 (2015).
- 865 27. A. N. Suarez, C. M. Liu, A. M. Cortella, E. E. Noble, S. E. Kanoski, Ghrelin and Orexin  
866 Interact to Increase Meal Size Through a Descending Hippocampus to Hindbrain  
867 Signaling Pathway. *Biol Psychiatry* **87**, 1001-1011 (2020).
- 868 28. G. D. Petrovich, N. S. Canteras, L. W. Swanson, Combinatorial amygdalar inputs to  
869 hippocampal domains and hypothalamic behavior systems. *Brain research reviews* **38**,  
870 247-289 (2001).
- 871 29. C. De La Rosa-Prieto *et al.*, Subicular and CA1 hippocampal projections to the accessory  
872 olfactory bulb. *Hippocampus* **19**, 124-129 (2009).
- 873 30. T. M. Hsu *et al.*, Hippocampus ghrelin receptor signaling promotes socially-mediated  
874 learned food preference. *Neuropharmacology* **131**, 487-496 (2018).
- 875 31. L. W. Swanson, W. M. Cowan, An autoradiographic study of the organization of the  
876 efferent connections of the hippocampal formation in the rat. *J Comp Neurol* **172**, 49-84  
877 (1977).
- 878 32. P. Sweeney, Y. Yang, An excitatory ventral hippocampus to lateral septum circuit that  
879 suppresses feeding. *Nat Commun* **6**, 10188 (2015).
- 880 33. A. Arszovszki, Z. Borhegyi, T. Klausberger, Three axonal projection routes of individual  
881 pyramidal cells in the ventral CA1 hippocampus. *Front Neuroanat* **8**, 53 (2014).
- 882 34. P. Y. Risold, L. W. Swanson, Structural evidence for functional domains in the rat  
883 hippocampus. *Science* **272**, 1484-1486 (1996).

- 884 35. R. Garcia, R. M. Vouimba, R. Jaffard, Spatial discrimination learning induces LTP-like  
885 changes in the lateral septum of mice. *Neuroreport: An International Journal for the*  
886 *Rapid Communication of Research in Neuroscience* **5**, 329-332 (1993).
- 887 36. R. Jaffard, R. M. Vouimba, A. Marighetto, R. Garcia, Long-term potentiation and long-  
888 term depression in the lateral septum in spatial working and reference memory. *J*  
889 *Physiol Paris* **90**, 339-341 (1996).
- 890 37. A. Carballo-Marquez, A. Vale-Martinez, G. Guillazo-Blanch, M. Marti-Nicolovius,  
891 Muscarinic receptor blockade in ventral hippocampus and prelimbic cortex impairs  
892 memory for socially transmitted food preference. *Hippocampus* **19**, 446-455 (2009).
- 893 38. R. A. Countryman, N. L. Kaban, P. J. Colombo, Hippocampal c-fos is necessary for long-  
894 term memory of a socially transmitted food preference. *Neurobiol Learn Mem* **84**, 175-  
895 183 (2005).
- 896 39. G. M. Parfitt *et al.*, Bidirectional Control of Anxiety-Related Behaviors in Mice: Role of  
897 Inputs Arising from the Ventral Hippocampus to the Lateral Septum and Medial  
898 Prefrontal Cortex. *Neuropsychopharmacology* **42**, 1715-1728 (2017).
- 899 40. N. L. Trent, J. L. Menard, The ventral hippocampus and the lateral septum work in  
900 tandem to regulate rats' open-arm exploration in the elevated plus-maze. *Physiology &*  
901 *behavior* **101**, 141-152 (2010).
- 902 41. J. C. Jimenez *et al.*, Anxiety Cells in a Hippocampal-Hypothalamic Circuit. *Neuron* **97**,  
903 670-683.e676 (2018).
- 904 42. T. M. Hsu *et al.*, Hippocampus ghrelin signaling mediates appetite through lateral  
905 hypothalamic orexin pathways. *Elife* **4** (2015).
- 906 43. M. S. Fanselow, H. W. Dong, Are the dorsal and ventral hippocampus functionally  
907 distinct structures? *Neuron* **65**, 7-19 (2010).
- 908 44. M. Contreras, T. Pelc, M. Llofriu, A. Weitzenfeld, J. M. Fellous, The ventral hippocampus  
909 is involved in multi-goal obstacle-rich spatial navigation. *Hippocampus* **28**, 853-866  
910 (2018).
- 911 45. S. L. T. Lee, D. Lew, V. Wickenheisser, E. J. Markus, Interdependence between dorsal and  
912 ventral hippocampus during spatial navigation. *Brain Behav* **9**, e01410 (2019).
- 913 46. D. P. Holschneider *et al.*, Cerebral perfusion mapping during retrieval of spatial memory  
914 in rats. *Behavioural brain research* **375**, 112116 (2019).
- 915 47. P. Sweeney, Y. Yang, Neural Circuit Mechanisms Underlying Emotional Regulation of  
916 Homeostatic Feeding. *Trends in endocrinology and metabolism: TEM* **28**, 437-448  
917 (2017).
- 918 48. D. S. Olton, The radial arm maze as a tool in behavioral pharmacology. *Physiology &*  
919 *behavior* **40**, 793-797 (1987).
- 920 49. H. H. Pothuizen, W. N. Zhang, A. L. Jongen-Rêlo, J. Feldon, B. K. Yee, Dissociation of  
921 function between the dorsal and the ventral hippocampus in spatial learning abilities of  
922 the rat: a within-subject, within-task comparison of reference and working spatial  
923 memory. *The European journal of neuroscience* **19**, 705-712 (2004).
- 924 50. L. E. Jarrard, L. P. Luu, T. L. Davidson, A study of hippocampal structure-function  
925 relations along the septo-temporal axis. *Hippocampus* **22**, 680-692 (2012).

- 926 51. P. Sweeney, Y. Yang, An Inhibitory Septum to Lateral Hypothalamus Circuit That  
927 Suppresses Feeding. *The Journal of neuroscience : the official journal of the Society for*  
928 *Neuroscience* **36**, 11185-11195 (2016).
- 929 52. D. Olivo, M. Caba, F. Gonzalez-Lima, J. F. Rodríguez-Landa, A. A. Corona-Morales,  
930 Metabolic activation of amygdala, lateral septum and accumbens circuits during food  
931 anticipatory behavior. *Behav Brain Res* **316**, 261-270 (2017).
- 932 53. L. W. Swanson, Brain maps 4.0-Structure of the rat brain: An open access atlas with  
933 global nervous system nomenclature ontology and flatmaps. *J Comp Neurol* **526**, 935-  
934 943 (2018).
- 935 54. R. C. Ritter, P. G. Slusser, S. Stone, Glucoreceptors controlling feeding and blood glucose:  
936 location in the hindbrain. *Science* **213**, 451-452 (1981).
- 937 55. E. E. Noble *et al.*, Hypothalamus-hippocampus circuitry regulates impulsivity via  
938 melanin-concentrating hormone. *Nat Commun* **10**, 4923 (2019).
- 939 56. B. Zingg *et al.*, AAV-Mediated Anterograde Transsynaptic Tagging: Mapping  
940 Corticocollicular Input-Defined Neural Pathways for Defense Behaviors. *Neuron* **93**, 33-  
941 47 (2017).
- 942 57. A. N. Suarez *et al.*, Gut vagal sensory signaling regulates hippocampus function through  
943 multi-order pathways. *Nat Commun* **9**, 2181 (2018).
- 944 58. J. D. Hahn, Swanson, L. W., Bowman, I., Foster, N. N., Zingg, B., Bienkowski, M. S.,  
945 Hintiryan, H., & Dong, H.-W. , An open access mouse brain flatmap and upgraded rat  
946 and human brain flatmaps based on current reference atlases. *J. Comp. Neurol.* (2020).
- 947 59. R. A. Countryman, P. E. Gold, Rapid forgetting of social transmission of food preferences  
948 in aged rats: relationship to hippocampal CREB activation. *Learn Mem* **14**, 350-358  
949 (2007).
- 950 60. B. G. Galef, Jr., W. Y. Lee, E. E. Whiskin, Lack of interference in long-term memory for  
951 socially learned food preferences in rats (*Rattus norvegicus*). *J Comp Psychol* **119**, 131-  
952 135 (2005).
- 953 61. B. G. Galef, Jr., E. E. Whiskin, Socially transmitted food preferences can be used to study  
954 long-term memory in rats. *Learn Behav* **31**, 160-164 (2003).
- 955 62. J. D. Hahn, O. Sporns, A. G. Watts, L. W. Swanson, Macroscale intrinsic network  
956 architecture of the hypothalamus. *Proc Natl Acad Sci U S A* **116**, 8018-8027 (2019).  
957
